18 **Abstract**

19 Antimicrobial resistance has been a growing concern that gradually undermines our tradition  
20 treatment regimen. The fact that few antibacterial drugs with new scaffolds or targets have  
21 been approved in the past two decades aggravates this crisis. Repurposing previously  
22 approved drugs as potent antibiotic adjuvants offers a cost-effective strategy to mitigate the  
23 development of resistance and tackle the increasing infections by multidrug-resistant (MDR)  
24 bacteria. Herein, we found that benzydamine, a widely used non-steroidal anti-inflammatory  
25 drug in clinic, remarkably potentiated broad-spectrum antibiotic-tetracyclines activity against  
26 a panel of clinical important resistant pathogens, including MRSA, VRE, MCRPEC and  
27 *tet(X)*-positive Gram-negative bacteria. Further mechanistically experiments showed that  
28 benzydamine dissipated membrane potential ( $\Delta\Psi$ ) in both Gram-positive and negative  
29 bacteria, which in turn upregulated the transmembrane proton gradient ( $\Delta\text{pH}$ ) and promoted  
30 the uptake of tetracyclines. Additionally, benzydamine exacerbated the oxidative stress by  
31 triggering the production of ROS and suppressing GAD system-mediated oxidative defensive.  
32 This mode of action explains the great bactericidal activity of the doxycycline-benzydamine  
33 combination against different metabolic states of bacteria including persister cells. As a  
34 proof-of-concept, the *in vivo* efficacy of this combination therapy was evidenced in multiple  
35 animal infection models. These findings revealed that benzydamine is a promising  
36 tetracycline antibiotics adjuvant and has the potential to address life-threatening infections by  
37 MDR bacteria.

38 **Keywords:** antimicrobial resistance, antibiotic adjuvant, benzydamine, multidrug-resistant  
39 bacteria

40

## 41 **1. Introduction**

42 The prevalence of chromosome or plasmid-conferred resistance determinants have  
43 severely impair the efficacy of clinically available antibiotics, rendering the onset of the  
44 global antimicrobial resistance crisis (Harrison and Brockhurst, 2012). Among these  
45 pathogenic bacteria, of particular concerns are ESKAPE (Enterococcus, *Staphylococcus*  
46 *aureus*, *Klebsiella pneumoniae*, *Acinetobacter baumannii*, *Pseudomonas aeruginosa*, and  
47 *Enterobacter* species), which are responsible for the majority of nosocomial infections  
48 worldwide with high morbidity and mortality (De Oliveira et al., 2020; Ma et al., 2020). As  
49 the increasing incidence of drug resistance, including multidrug resistance and pandrug  
50 resistance (PDR), in these ESKAPE clinical isolates, bacterial infection associated diseases  
51 are becoming harder to treat. Notably, carbapenems, colistin and tigecycline are recognized  
52 as extremely crucial antibiotics and last-options against these drug-resistant bacteria.  
53 However, the emergence of carbapenemase (Gupta et al., 2011), *mcr-1*-encoded  
54 phosphoethanolamine transferase (Liu et al., 2016) and *tet(X)*-mediated flavin-dependent  
55 (FAD) monooxygenase (He et al., 2019; Sun et al., 2019) in bacteria from animal and humans  
56 source completely extinguished our last hope. Meanwhile, few novel antibiotics entities with  
57 distinct scaffolds or modes of action have been approved for clinical use during the past  
58 decades due to the huge scientific and commercial challenges in the development of new  
59 drugs (Lewis, 2020; Liu et al., 2019a). There is a dire need to identify alternative strategies to  
60 address these infections.

61 Repurposing previously approved drugs as potential antibiotic adjuvants to reverse  
62 antibiotic resistance and restore antibiotic activity represents a simple but effective approach  
63 to counter this problem (Liu et al., 2019b; Wright, 2016). For example, our previous studies  
64 have showed that hypoglycemic drugs metformin could resensitize *tet(A)*-positive bacteria to  
65 tetracycline through disrupting the functions of efflux pumps (Liu et al., 2020b). Melatonin,  
66 which has been applied for treating sleep disturbances and circadian disorders, potentiated  
67 colistin activity against MCR-positive bacteria by enhancing the membrane damage (Liu et  
68 al., 2020c). Anti-HIV agent azidothymidine decreased Tet(X3/X4)-mediated bacterial  
69 resistance to tigecycline in *Escherichia coli* through specifically inhibiting DNA synthesis

70 and suppressing resistance enzyme activity (Liu et al., 2020a; Zhou et al., 2020).  
71 Benzydamine is a locally-acting nonsteroidal anti-inflammatory drug with local anaesthetic  
72 and analgesic properties by selectively binding to prostaglandin synthetase (Avvisati et al.,  
73 2018; Nettis et al., 2002). Recently, benzydamine was found to inhibit osteoclast  
74 differentiation and bone resorption by down-regulating the expression of interleukin-1 $\beta$  (Son  
75 et al., 2020). In addition, benzydamine significantly reduced oral mucositis even at doses >50  
76 Gy in head and neck cancer patients (Rastogi et al., 2017). However, the adjuvant potential of  
77 benzydamine to existing antibiotics is still unclear. In the present study, we characterized the  
78 synergistic activity of benzydamine with different classes of antibiotics, and found that it  
79 drastically potentiated tetracyclines activity against various MDR pathogens. Importantly,  
80 benzydamine dissipated membrane potential ( $\Delta\Psi$ ) in both Gram-positive and negative  
81 bacteria, which in turn upregulated the transmembrane proton gradient ( $\Delta\text{pH}$ ) and promoted  
82 the uptake of tetracyclines. Meanwhile, benzydamine synergized with doxycycline on killing  
83 a spectrum of bacterial pathogens carrying *mecA*, *bla*<sub>MBL</sub> and/or *mcr* genes, as well as *tet(X)*  
84 by triggering oxidative damage. Notably, benzydamine potently restored the doxycycline  
85 activity in multiple animal infection models infected by MDR MRSA T44 or *E. coli* B2. This  
86 study firstly revealed the therapeutic potential of benzydamine as a novel antibiotic adjuvant  
87 for the treatment of infection caused by MDR pathogens.

88

## 89 2. Results

### 90 2.1 Benzylamine potentiates doxycycline activity in both drug-susceptible and resistant 91 bacteria

92 We first evaluated the synergistic activity of benzylamine with eight classes of antibiotics  
93 against multidrug-resistant bacteria *E. coli* B2 using checkerboard broth microdilution assays.  
94 Out of these drugs, colistin, ciprofloxacin and doxycycline showed synergistic activity with  
95 benzylamine, whereas kanamycin displayed an antagonistic effect with benzylamine  
96 (**Figure 1-figure supplement 1 and Table 1**). Remarkably, the combination of benzylamine  
97 and doxycycline possessed the highest synergistic effect (FICI = 0.188), which enabled the  
98 MIC value of doxycycline decreased from 32 µg/mL to 2 µg/mL (16-fold). We further tested  
99 the potentiation of benzylamine to other tetracyclines, including tetracycline, oxytetracycline,  
100 minocycline and tigecycline. As expected, their antibacterial activity were all significantly  
101 improved in the presence of benzylamine (**Table 1**). Subsequently, the checkerboard broth  
102 microdilution assays were applied to both sensitive and resistant bacteria. Interestingly, the  
103 combination of benzylamine and doxycycline showed synergy effect in all test bacteria,  
104 including hard-to-treat pathogenic bacteria methicillin-resistant *Staphylococcus aureus*  
105 (MRSA) T144 (FICI = 0.188), VRE A4 (FICI = 0.375), *bla*<sub>NDM-5</sub>-positive *E. coli* G6 (FICI =  
106 0.375), *mcr-1*-carrying *K. pneumoniae* D120 (FICI = 0.375) and *tet(X6)*-positive *A.*  
107 *baumannii* C222 (FICI = 0.5). Notably, this combination displayed a higher synergistic effect  
108 in drug-resistant bacteria than sensitive bacteria, suggesting that its activity is also related to  
109 the inhibition of resistance determinants (**Figure 1 and Table 2**).

110 Next, we assessed whether the synergistic activity of this combination would result in  
111 increasing toxicity, including hemolytic activity on mammals RBCs and *in vivo* toxicity in  
112 mice (Lakshmaiah Narayana et al., 2020). Surprisingly, no detectable toxicity in hemolysis  
113 rate, body weight and blood biochemical analysis were found in the  
114 benzylamine-doxycycline combination treatment (**Figure 1-figure supplement 2 and 3**).  
115 These data suggested that benzylamine was a safe and potent antibiotic adjuvant to  
116 tetracyclines.

117

## 118 **2.2 Benzydamine dissipates the electric potential ( $\Delta\Psi$ ) component of proton motive** 119 **force and promotes the uptake of doxycycline**

120 Our prior results have shown that benzydamine is a universal adjuvant to tetracycline  
121 antibiotics in all tested strains, but antagonize kanamycin activity in *E. coli* B2. We next  
122 assessed the interaction of benzydamine and kanamycin in a panel of bacteria. As a  
123 consequence, a significant antagonism effect were found in all bacteria (FICI > 2.0, **Figure 1**  
124 **and Figure 1-figure supplement 4**). The opposite action of benzydamine in combination  
125 with doxycycline or kanamycin inspired us to speculate on the mechanism of action of  
126 benzydamine may be directly related to the destruction of the bacterial proton motive force  
127 (PMF) (Farha et al., 2018). In bacteria, the transmembrane transfer of proton  $H^+$  by the  
128 respiratory chain results in an electrochemical gradient, named PMF. It consists of two parts,  
129 electric potential ( $\Delta\Psi$ ) and pH difference ( $\Delta pH$ ) (Mitchell, 2011). Damage to one will be  
130 compensated by increasing another to achieve dynamic balance (Chen et al., 2008). Previous  
131 studies have indicated that the uptake of tetracyclines by bacterial cells depends on  $\Delta pH$ ,  
132 whereas aminoglycosides utilizes the  $\Delta\Psi$  component for transport, therefore, we concerned  
133 that benzydamine might target the  $\Delta\Psi$  component of PMF. To test our hypothesis, a  
134 fluorescent probe 3,3-dipropylthiadicarbocyanine iodide (DiSC<sub>3</sub>(5)) (Liu et al., 2020d) was  
135 used to assess membrane potential changes induced by doxycycline, benzydamine alone or  
136 their combination. After treatment of four representative strains (*S. aureus* ATCC 29213,  
137 MRSA T144, *E. coli* ATCC 25922 and *E. coli* B2; two Gram-positive and two  
138 Gram-negative bacteria; also two doxycycline-sensitive and two doxycycline-resistance  
139 bacteria) with 4-fold MIC of doxycycline, the fluorescence of Gram-positive bacteria hardly  
140 changed and Gram-negative bacteria slightly increased. However, treatment with 125-1,000  
141  $\mu g/mL$  of benzydamine resulted in rapid disruption of electric potential in a dose-dependent  
142 manner (**Figure 2A**). Next, we measured the fluorescence with 1 to 4-fold MIC of  
143 doxycycline or combination with 250  $\mu g/mL$  of benzydamine. The combination of  
144 benzydamine and doxycycline indeed resulted in increased fluorescence (**Figure 2B**),  
145 suggesting that benzydamine is definitely a potential dissipator of  $\Delta\Psi$ . The extracellular pH  
146 values are also related to the PMF. A previous study demonstrated that the antibacterial

147 activity of the dissipater of  $\Delta\Psi$  will be strengthened when the extracellular pH changed to the  
148 alkaline values (Farha et al., 2013). Consistent with the membrane potential results, the MIC  
149 of benzydamine were reduced by 8-fold due to the pH from 5.5 to 9.5 in the Gram-negative  
150 bacteria, and 4-fold change for Gram-positive bacteria (**Figure 2C**). An intact PMF is  
151 required for the bacterial function in flagellar secretion, thus we next examined the integrity  
152 of PMF through swimming motility experiments (Brunelle et al., 2017). Exposure of four  
153 strains to sub-inhibitory concentrations of benzydamine drastically decreased bacterial  
154 motility (**Figure 2D**), suggesting the impaired PMF in benzydamine-treated bacterial cells.  
155 These evidences demonstrated that benzydamine disrupted the PMF by targeting  $\Delta\Psi$   
156 component.

157 There is a compensation mechanism that damage to one will be compensated by increasing  
158 another to maintain the dynamic balance of PMF. We have observed that benzydamine  
159 selectively disrupted the  $\Delta\Psi$  in before, so we further set out to test whether  $\Delta\text{pH}$  will be  
160 compensatory upregulated. A membrane-permeable fluorescent probe termed BCECF-AM  
161 (Ozkan and Mutharasan, 2002) was used to monitor intracellular pH changes in four strains.  
162 Interestingly, completely opposite pH changes were observed in Gram-positive and negative  
163 bacteria. Benzydamine led to the acidification of the cytoplasm in  $G^+$ , but alkalization of  
164 cytoplasm in  $G^-$  (**Figure 3A**). Nevertheless, both these actions triggered the upregulation of  
165  $\Delta\text{pH}$  in bacteria. Given that the increasing  $\Delta\text{pH}$  by benzydamine may promote the uptake of  
166 tetracyclines, thus we determined the intracellular doxycycline accumulation after exposure  
167 to varying concentrations of benzydamine (Ejim et al., 2011). As expected, benzydamine  
168 supplementation remarkably enhanced the content of doxycycline in bacteria (**Figure 3B**).  
169 Tetracyclines exhibit activity by specifically binding to the 30S subunit of the ribosome, thus  
170 inhibiting bacterial protein synthesis (Chopra and Roberts, 2001). Therefore, the uptake and  
171 accumulation of tetracyclines is of importance for its antibacterial activity. Collectively, these  
172 results suggested that benzydamine dissipated the  $\Delta\Psi$ , in turn upregulate the  $\Delta\text{pH}$ , thereby  
173 promoted the uptake of tetracyclines.

174

175 **2.3 Doxycycline plus benzydamine is bactericidal against MDR bacteria and**  
176 **biofilm-producing bacteria**

177 It has been widely acknowledged that tetracyclines belong to bacteriostatic antibiotics. We  
178 reasoned whether the benzydamine-doxycycline combination would possess bactericidal  
179 activity, which would markedly extend its therapeutic potential. To test this hypothesis, we  
180 performed time-killing experiments on various MDR pathogens. Impressively, a direct  
181 synergistic bactericidal effect was observed in rich growth conditions (**Figure 4A**).  
182 Specifically, either 32 µg/mL doxycycline or 250 µg/mL benzydamine showed slight  
183 bactericidal activities. In comparison, the combination of doxycycline plus benzydamine (32  
184 + 250 µg/mL) exhibited excellent bactericidal activity, especially for *E. coli* B2. Besides, to  
185 determine whether benzydamine has potency to combat metabolically repressed and  
186 non-replicating cells, we test the bactericidal activity of this combination in nutrient-free  
187 buffer. Remarkably, this combination retained potent bactericidal activity (**Figure 4B**).

188 The formation of antibiotic-tolerant biofilms greatly affect the efficacy of antibiotics (Hall  
189 and Mah, 2017; Yan and Bassler, 2019). To explore whether benzydamine supplementation  
190 can enhance doxycycline activity against the biofilm-producing bacteria, we performed the  
191 formation and eradication of biofilms experiments in the presence or absence of different  
192 concentrations of benzydamine. As shown in **Figure 4-figure supplement 1A**, the  
193 combination of benzydamine at 50 µg/mL with sub-MIC of doxycycline significantly  
194 inhibited biofilm formation of MRSA T144 and *E. coli* B2. Notably, in the biofilm inhibition  
195 assay, the benzydamine plus doxycycline at concentrations of  $\leq 2$  µg/mL did not have  
196 bacteriostatic activity against two test strains, indicating that the inhibition of biofilm  
197 formation at these concentrations was not due to the effect on bacterial growth. Besides, in  
198 the presence of benzydamine, the eradication effect of doxycycline on mature biofilm is  
199 significantly enhanced compared with doxycycline alone (**Figure 4-figure supplement 1B**).  
200 Taken together, we unexpectedly found that the combination of doxycycline plus  
201 benzydamine displayed great bactericidal activity against various MDR pathogens in  
202 different metabolic states, including metabolically active cells, antibiotic-tolerant cells and  
203 biofilm-producing bacteria.

204

205 **2.4 Benzydamine aggravates oxidative damage and inhibits the function of MDR efflux**



## 206 pumps

207 Having shown that the synergistic bactericidal activity of benzydamin-doxycycline  
208 combination, we reasoned that benzydamine may trigger other unknown modes of action  
209 except for the promotion of doxycycline uptake. To explore the underlying mechanisms, we  
210 performed transcription analysis of *E. coli* B2 under treatment with doxycycline or  
211 doxycycline plus benzydamine for 4 h. The comparison of treatment with combination to  
212 antibiotic alone revealed an up-regulation of 35 differentially expressed genes (DEGs) and  
213 down-regulation of 14 DEGs (**Figure 5-figure supplement 1A**). GO annotation analysis  
214 showed that these DEGs were involved in biological processes, cellular components and  
215 molecular functions (**Figure 5-figure supplement 1B**). KEGG enrichment analysis displayed  
216 that these DEGs with increased expression were involved in ribosome synthesis, and DEGs  
217 with repressed expression in glutamate metabolism and GABA shunt (**Figure 5-figure**  
218 **supplement 1C and D**). Notably, genes with 30S and 50S subunit were up-regulated, which  
219 may be caused by increased accumulation of doxycycline that inhibits protein synthesis  
220 (**Figure 5A and source data 2**). In contrast, multidrug efflux pumps related genes, glutamate  
221 decarboxylase (GAD) system associated genes, and acid resistance related gene was  
222 obviously decreased (**Figure 5B and source data 2**).

223 Based on the transcription results, we next performed a series of phenotype experiments to  
224 elucidate the other functions of benzydamine. Firstly, we evaluated the efficacy of  
225 combination in the different pH growth environment via time-killing experiments. We found  
226 that it has almost no effect in the acid media, however, the combination of doxycycline with  
227 benzydamine showed manifest bactericidal activity while a change in pH to alkaline values.  
228 Under treatment 4 hours, the bacteria were all killed in the MHB broth at pH 8.5 and 9.5  
229 (**Figure 6A**). These data were in agreement with previous observation that antibacterial  
230 activity of benzydamine was strengthened in the alkaline conditions and the genes associated  
231 with acid resistance were down-regulated. Recently, several studies reported that GAD  
232 systems, which was downregulated in combination group, plays a critical role in protecting  
233 bacteria against oxidative stress (Boura et al., 2020; Feehily and Karatzas, 2013), thus we  
234 hypothesized that the potentiation of benzydamine to antibiotics may also correlate to

235 enhanced oxidative damage. Thus, we tested the generation of reactive oxygen species (ROS)  
236 (Voorhees, 2003) in *E. coli* B2 after treatment with either benzydamine or in combination  
237 with doxycycline. Surprisingly, benzydamine markedly promoted the generation of ROS in a  
238 dose-dependent manner (**Figure 6B**). Meanwhile, the combination treatment showed higher  
239 ROS levels compared to doxycycline monotreatment (**Figure 6C**). Accordingly, ROS has  
240 been recognized as one of common mechanisms in antibiotic-mediated killing of bacteria.  
241 The over-production of ROS in benzydamine-doxycycline combination give an interpretation  
242 on their synergistic bactericidal activity. To further verify it, *N*-acetyl-*L*-cysteine (NAC), a  
243 ROS scavenger, was added in time-killing assays. As shown in **Figure 6D**, the potentiation of  
244 benzydamine to doxycycline was greatly impaired when incubation with 2 or 4 mM NAC.  
245 Finally, we used a fluorescent dye Rhodamine B to assay the function of efflux pump in  
246 bacteria under the treatment of benzydamine (**Figure 6E**). As a result, it showed that the  
247 activity of efflux pump was significantly suppressed in the presence of 250-1,000  
248  $\mu\text{g/mL}$  benzydamine, which further promoted the accumulation of doxycycline in the MDR  
249 bacteria. Collectively, these phenomenon together demonstrated that benzydamine enhanced  
250 oxidative damage through triggering the production of ROS and inhibiting the function of  
251 MDR efflux pumps (**Figure 6F**).

252

## 253 **2.5 Benzydamine restores doxycycline efficacy *in vivo* infection models**

254 In view of the excellent synergy of doxycycline and benzydamine against MDR pathogens  
255 *in vitro*, we next tested whether they have potent activity *in vivo* with two animal infection  
256 models infected by MRSA T144 or *E. coli* B2. Firstly, we used a *G. mellonella* larvae  
257 infection model to explore their efficacy *in vivo*. As shown in **Figure 7A**, the infected larvae  
258 with the combination therapy of doxycycline plus benzydamine (50 + 50 mg/kg) resulted in  
259 above 80% survival during 5 days, which was higher than the doxycycline monotreatment ( $P$   
260 = 0.0174 or 0.0397, corresponding to MRSA T144 and *E. coli* B2, respectively). In addition,  
261 the efficacy of this combination therapy in a neutropenic mouse thigh infection model was  
262 evaluated (**Figure 7B**). Similarly, the doxycycline plus benzydamine (50 + 10 or 50 + 50  
263 mg/kg) significantly reduced bacterial burden in mice thighs compared with doxycycline

264 alone ( $P < 0.0001$ ). These data demonstrated the benzydamine plus doxycycline also has an  
265 excellent synergy effect *in vivo*.  
266

### 267 3. Discussion

268 The development of multidrug resistance (MDR), extensive drug resistance (XDR), or  
269 pandrug resistance (PDR) phenotype in pathogenic bacteria undermines the clinical efficacy  
270 of antibiotics and leaves no available options for treatment of intractable bacterial infections  
271 (Falagas and Karageorgopoulos, 2008; Magiorakos et al., 2012). Despite many ongoing  
272 effects in identifying new classes of antimicrobial agents (Imai et al., 2019; Luther et al.,  
273 2019), few antibiotics have been approved for clinical use in the past 20 years. Accordingly,  
274 the average cost of research and development of a new drug from discovery to regulatory  
275 approval is US\$2.6 billion, which takes more than 10 years, and the successful launch is less  
276 than one thousandth (Avorn, 2015; DiMasi et al., 2016). As such, alternative strategies are  
277 warranted to confront this serious global crisis. Repurposing previously approved  
278 non-antibacterial drugs as potential antibiotic adjuvants is gaining traction in both the public  
279 and private sector (Tyers and Wright, 2019). In this study, we revealed the adjuvant potential  
280 of benzydamine, a widely used non-steroidal anti-inflammatory drug in clinic, in combination  
281 with three classes of antibiotics against MDR *E. coli* B2. Most importantly, benzydamine  
282 displayed the greater synergistic activity with tetracyclines, which belong to broad-spectrum  
283 antibiotics. For various MDR pathogens, including MRSA, VRE,  
284 NDM/MCR-1/*tet*(X4)-expressing Gram-negative bacteria, the doxycycline-benzidamine  
285 combination showed unprecedented synergistic activity. Biofilm-producing bacteria are  
286 important causes of chronic and recurrent bacterial infection, but are commonly overlooked  
287 in the drug discovery. We found that the doxycycline-benzidamine combination is able to  
288 prevent the formation of *S. aureus* and *E. coli* biofilm, as well as eradicate the established  
289 biofilms. These data further support the notion that benzydamine is a great antibiotic adjuvant  
290 candidate to reverse bacterial resistance.

291 Bacterial energy metabolism such as proton motive force (PMF) plays a critical role in  
292 cellular activities including material transport, flagellar motility and ATP synthesis by the  
293  $F_1F_0$ -ATPase (Paul et al., 2008). The disruption of PMF would inhibit the basic functions of  
294 bacteria and accelerate its death. Nevertheless, the PMF has remain largely unexplored as a  
295 target for the development of antimicrobial agents. Excitingly, using a deep learning approach,

296 an new broad-spectrum antibiotic termed halicin was identified to selectively destroy the  
297 PMF (Stokes et al., 2020). Molecules I1- I3 and D1-D3, the potential modulators of PMF,  
298 showed killing activity against MRSA through preventing the electron transport and ATP  
299 synthesis (Farha et al., 2013). Generally, the PMF is comprised of two parameters: the  
300 electric potential ( $\Delta\Psi$ ) and the transmembrane proton ( $\Delta\text{pH}$ ). Interestingly, to maintain the  
301 bacterial PMF, dissipation of either component would be compensatory increased by the  
302 another. In our study, we uncovered that benzydamine dissipated the  $\Delta\Psi$  component of the  
303 PMF in both Gram-positive and Gram-negative bacteria, in turn increased the  $\Delta\text{pH}$ , which  
304 was critical for the uptake of tetracyclines. These findings was consistent with previous study  
305 that tetracyclines uptake is driven by  $\Delta\text{pH}$  (Yamaguchi et al., 1991), whereas  
306 aminoglycosides uptake is highly dependent on  $\Delta\Psi$  (Taber et al., 1987). Toxicity concerns are  
307 critical factors that limit the clinical trials of new drugs (Segall and Barber, 2014).  
308 Meaningfully, in both *in vitro* and *in vivo* experiments, the combination of doxycycline and  
309 benzydamine exhibited negligible toxicity, indicating that the pre-clinical safety of this  
310 combination. Consistently, the successful paradigm of daptomycin depolarizing the  
311 cytoplasmic membrane provide a proof-of-concept for PMF-targeted antimicrobial agents  
312 (Hawkey, 2008). These findings suggest that bacterial PMF is a promising target for the  
313 development of novel antimicrobial agents and antibiotic adjuvants.

314 Furthermore, the doxycycline-benzydamine combination showed excellent synergistic  
315 bactericidal activity for all test MDR isolates, implying the actions of benzydamine is not  
316 merely for the promotion of tetracyclines uptake. Transcriptomic analysis coupled with  
317 phenotype experiments indicated that benzydamine not only triggered the generation of ROS,  
318 but also downregulated the GAD system that protects bacteria from oxidative damage. These  
319 modes of action resulted in the oxidative burst, which has been proved to be important for  
320 antibiotic-mediated killing. Additionally, the functions of MDR efflux pumps in bacteria were  
321 severely destroyed, in partly due to the dissipation of PMF by benzydamine. It would be  
322 interesting to investigate the potential of benzydamine as a new and broad-spectrum inhibitor  
323 of MDR efflux pumps.

324 To conclude, our findings revealed that non-steroidal anti-inflammatory drug benzydamine  
325 may serve as a novel antibiotic adjuvant to restore clinically relevant antibiotics activity  
326 particularly tetracyclines against infections caused by MDR pathogens. In addition, the  
327 identification and characterization of benzydamine demonstrate the remarkable potential of  
328 PMF downregulators as a feasible adjuvant therapy to tackle the escalating concern of  
329 antibiotic resistance.  
330

## 331 **4. Materials and methods**

### 332 **Bacteria and reagents**

333 All strains used in this study were listed in **Source data 1**. The bacteria were stored in  
334 nutrient broth supplemented with 20% (v/v) glycerol at  $-80^{\circ}\text{C}$ . For experiments, all strains  
335 were grown in Mueller-Hinton Broth (MHB) or on LB agar (LBA) plates. Antibiotics were  
336 obtained from China Institute of Veterinary Drug Control and other chemical reagents were  
337 purchased from Aladdin (Shanghai, China) or TCI (Shanghai, China).

338

### 339 **MIC determinations**

340 The MICs of all antibiotics and benzydamine were determined using broth dilution method,  
341 according to the CLSI 2018 guideline (In, 2018). All drugs were two-fold diluted in MHB  
342 and equally mixed with bacterial suspensions in a 96-well microtiter plate (Corning, New  
343 York, USA). After 16-20 h incubation at  $37^{\circ}\text{C}$ , the MIC values were defined as the lowest  
344 concentrations of drugs with no visible growth of bacteria.

345

### 346 **Checkerboard analyses and FIC index determination**

347 The fractional inhibitory concentrations (FIC) indices were measured by the checkerboard  
348 analyses (Song et al., 2020). Briefly, 100  $\mu\text{L}$  of MHB was added into each well of a 96-well  
349 plate with  $8 \times 8$  matrix, then the antibiotics and compounds were 2-fold diluted along the  
350 abscissa and ordinate, respectively. After incubated at  $37^{\circ}\text{C}$  for 18 h with bacterial  
351 suspension ( $1.5 \times 10^6$  CFUs/well), the optical density of each well at 600 nm were  
352 determined. The FIC was calculated as the MIC when the compound is used in combination  
353 divided by the MIC when it is used alone. The FIC index is the sum of the FICs of two  
354 compounds, and synergy is defined with FIC index  $\leq 0.5$ .

355

### 356 **Hemolysis analysis**

357 Hemolytic activity of doxycycline or in combination with benzydamine was assessed based  
358 on previous study (Liu et al., 2017). Briefly, 8% sheep blood cells was equal-volume  
359 incubated with 0 to 256  $\mu\text{g}/\text{mL}$  doxycycline alone or in combination with 250  $\mu\text{g}/\text{mL}$

360 benzydamine at 37 °C for 1 h. Phosphate buffer saline (PBS) and double-distilled water were  
361 used as negative and positive control, respectively. The absorption of released hemoglobin  
362 was measured at 576 nm by an Infinite M200 Microplate reader (Tecan, Männedorf,  
363 Switzerland). Hemolysis rate (%) was calculated by the result of absorbance of the sample  
364 subtracting the negative control divided by the positive control subtracting the negative  
365 control.

366

### 367 ***In vivo* toxicity of benzydamine-doxycycline combination**

368 The *in vivo* toxicity was evaluated by gavaging a combination of doxycycline plus  
369 benzydamine (10 + 10 mg/kg) to female CD-1 mice (n = 6 per group). Mice were  
370 continuously gavaged for 6 days and body weights were recorded daily. On the seventh day,  
371 blood was collected for blood biochemical test and cell analysis.

372

### 373 **Inhibition of biofilm formation**

374 MRSA T144 and *E. coli* B2 suspensions ( $1 \times 10^7$  CFUs per mL) were exposed to doxycycline  
375 solutions (final concentrations ranging from 0.125 to 2 µg/mL) in the presence or absence of  
376 50 µg/mL benzydamine. As negative control, bacteria were exposed to MHB without drugs.  
377 Bacteria were grown for 36 h at 37 °C under static conditions, and then 300 µL PBS was used  
378 to remove the planktonic bacteria. Then, added 200 µL of methanol to fix for 15 minutes,  
379 after that, the fixative were aspirated to air dry and 0.1% crystal violet was added for staining  
380 during 15 minutes. Dye solution was removed and stained-biofilm was washed three times  
381 with PBS and dried naturally. Lastly, crystal violet-stained biofilms were solubilized with 33%  
382 glacial acetic acid (100 µL) and incubated at 37 °C for 30 minutes. Biofilm mass was  
383 determined by monitoring the absorbance of supernatant at 570 nm (De et al., 2018).

384

### 385 **Biofilm eradication assay**

386 Overnight MRSA T144 and *E. coli* B2 were diluted 1:100 into MHB and incubated at 37 °C  
387 with sharking at 200 rpm for 6 h. Subsequently, 100 µL bacterial suspensions were mixed  
388 with an equal volume of MHB in 96-well microtitre plate. After 36 h incubation at 37 °C, the



389 planktonic bacteria were removed. Next, biofilms were treated with 32 to 256 µg/mL  
390 doxycycline alone or in combination with 50 µg/mL benzydamine. After 2 h incubation at  
391 37 °C, the remaining cells was dispersed via ultrasonic treatment for 20 minutes. Finally, the  
392 mixed liquor was resuspended in sterile PBS and then the dilutions were plated on LBA  
393 plates and incubated overnight at 37 °C.

394

### 395 **Measurement of membrane potential**

396 The membrane potential of *S. aureus* ATCC 29213, MRSA T144, *E. coli* ATCC 25922 and *E.*  
397 *coli* B2 was tested by the fluorescent probe DiSC<sub>3</sub>(5) (Aladdin, Shanghai, China). Bacterial  
398 cells were grown to the log phase in MHB, then washed with PBS to the OD<sub>600</sub> of 0.5 and  
399 incubated with DiSC<sub>3</sub>(5) ( $0.5 \times 10^{-6}$  M) for 30 min. Finally, varying concentrations of  
400 benzydamine (10 µL ) were added into the 190 µL of DiSC<sub>3</sub>(5)-loaded cells. For all  
401 membrane potential experiments, the fluorescence intensity was measured with the excitation  
402 wavelength at 622 nm and emission wavelength at 670 nm using a Microplate reader (Tecan,  
403 Männedorf, Switzerland).

404

### 405 **Swimming motility experiment**

406 0.3% (w/v) agar media composed of trypticase peptone (10 g/L), NaCl (10 g/L) and yeast  
407 extract (5 g/L) was used to assess bacterial swimming motility (Ejim et al., 2011). After the  
408 medium reached 50 °C, the final concentrations of benzydamine at 0, 31.25, 62.5, 125 and  
409 250 µg/mL were added. A 2-µL volume of *S. aureus* 29213, MRSA T144, *E.coli* 25922 and  
410 *E.coli* B2 culture at an OD<sub>600</sub> of 0.5 was placed in the center of each plate and allowed to stay  
411 for 30 min. The plates were placed in a 37 °C incubator for 48 h.

412

### 413 **Measurement of intracellular pH values**

414 Overnight *S. aureus* ATCC 29213, MRSA T144, *E. coli* ATCC 25922 and *E. coli* B2 were  
415 resuspended to OD<sub>600</sub> of 0.5 with PBS, and the final concentration of pH-sensitive fluorescent  
416 probe BCECF-AM (Ozkan and Mutharasan, 2002) ( $2 \times 10^{-6}$  M for G<sup>-</sup> bacteria and  $0.5 \times 10^{-6}$   
417 M for G<sup>+</sup> bacteria) was added. After incubation for 30 min, four strains were treated with final

418 concentration of benzydamine (125-1,000  $\mu\text{g}/\text{mL}$ ). The fluorescence intensity was  
419 immediately monitored with the excitation wavelength of 488 nm and emission wavelength  
420 of 535 nm.

421

#### 422 **Uptake of doxycycline**

423 Doxycycline uptake was evaluated by monitoring the fluorescence change of drug in bacteria  
424 (Ejim et al., 2011). Culture of MRSA T144 and *E. coli* B2 were grown to  $\text{OD} = 0.5$ . Cells  
425 were centrifuged at 3,500 rpm for 10 minutes and washed in the equal volume of PBS for  
426 three times. Subsequently, doxycycline at MIC alone or with final concentration of  
427 benzydamine at 250-1,000  $\mu\text{g}/\text{mL}$  were added into the 96-wells plates containing cell  
428 suspensions at 100  $\mu\text{L}/\text{well}$ . Infinite Microplate reader was used to monitor the fluorescence  
429 intensity with the excitation wavelength of 405 nm and emission wavelength of 535 nm.

430

#### 431 **Measurement of ROS levels**

432 The fluorescence probe 2',7'-dichlorodihydrofluorescein diacetate (DCFH-DA, 10  $\mu\text{M}$ )  
433 (Aranda et al., 2013) (Beyotime, Shanghai, China) was used to test the levels of ROS in *E.*  
434 *coli* B2 treated by benzydamine, doxycycline or their combination. After incubation 1 h, the  
435 fluorescence intensity was measured with the excitation wavelength of 488 nm and emission  
436 wavelength of 525 nm.

437

#### 438 **Efflux pump assay**

439 A fluorescence dye, rhodamine B (Forster et al., 2012) was applied to assay the inhibition of  
440 efflux pump of *E. coli* B2 and MRSA T144 treated by benzydamine. Bacterial cells were  
441 grown in MHB broth to mid-log phase ( $\text{OD} = 0.5$ ) at 37 °C with shaking 200 rpm, then the  
442 cultures were washed and suspended with PBS. Subsequently, a final concentration of  
443 rhodamine B (Aladdin, Shanghai, China) ( $5 \times 10^{-6}$  M) was added. After incubation at 37 °C  
444 for 30 min, probe-labeled cells were treated by doxycycline or benzydamine for 30 min, and  
445 the cultures washed and suspended with PBS containing 1% glucose. After incubation at  
446 37 °C for 30 min, bacterial cells were centrifuged at 6,000 rpm at 4 °C for 5 min and

447 supernatant was collected to determine with the excitation wavelength of 540 nm and  
448 emission wavelength of 625 nm.

449

#### 450 **Time-dependent killing curves**

451 Overnight culture of *E. coli* B2, *K. pneumoniae* D120 (*mcr-8*), *A. baumannii* C222 (*tet(X6)*),  
452 MRSA T144 and VRE A4 were diluted 1/1,000 in MHB, and incubated for 4 h at 37 °C with  
453 shaking at 200 rpm. Bacteria were then treated with either PBS, doxycycline (16 or 32  
454 µg/mL) or benzydamine (250 µg/mL) alone or their combination. At the time points 0, 4, 8,  
455 12, and 24 h, 100 µL aliquots were removed, centrifuged and resuspended in sterile PBS, the  
456 dilutions were plated on LBA plates and incubated overnight at 37 °C.

457

#### 458 **Transcriptomic analysis**

459 *E. coli* B2 were grown in MHB to the early exponential phase, then the final concentration of  
460 doxycycline (32 µg/mL) alone or in combination of benzydamine (250 µg/mL) was added.  
461 After incubation for 4 h, total RNA of culture was extracted by an EASYspin Plus kit (Aidlab,  
462 Beijing, China) and quantified by using a Nanodrop spectrophotometer (Thermo Scientific,  
463 MA, USA), and sequenced on Hiseq2000 with Truseq SBS Kit v3-HS (200 cycles) (Illumina)  
464 with the read length as  $2 \times 100$  (PE100). Raw sequencing reads were filtrated and mapped  
465 against the reference genome of *E. coli* K-12. The FPKM (Fragments Per Kilobase of  
466 transcript per Million mapped reads) method was used to identify differentially-expressed  
467 genes with p-values  $\leq 0.05$  and fold change (FC) values  $\geq 2$  ( $\log_2 \text{FC} \geq 1$  or  $\log_2 \text{FC} \leq -1$ ).  
468 Differences between these two treatments were studied by Cuffdiff program  
469 (<http://cufflinks.cbcb.umd.edu/>)

470

#### 471 ***Galleria mellonella* infection model**

472 *Galleria mellonella* larvae (Huiyude Biotech Company, Tianjin, China) were divided into  
473 four groups (n = 8 per group) and infected with MRSA T144 ( $10^6$  CFU<sub>S</sub>) or *E. coli* B2 ( $10^7$   
474 CFU<sub>S</sub>) suspension. After 1 h post infection, group 1 was subjected to PBS treatment, groups 2  
475 and 3 were treated with doxycycline or benzydamine (50mg/kg) respectively, group 4 was

476 treated with doxycycline plus benzydamine (50 + 50 mg/kg). Survival rates of *Galleria*  
477 *mellonella* larvae were recorded for 5 days.

478

#### 479 **Neutropenic mouse thigh infection model**

480 6-8-week-old female CD-1 mice were obtained from Comparative Medicine Centre of  
481 Yangzhou University (Jiangsu, China). Mice studies were performed in accordance with the  
482 guidelines of Jiangsu Laboratory Animal Welfare and Ethical of Jiangsu Administrative  
483 Committee of Laboratory Animals. The protocols for all animal studies were approved by  
484 Jiangsu Administrative Committee for Laboratory Animals (Permission number:  
485 SYXKSU-2007-0005). The laboratory animal usage license number is SCXK-2017-0044,  
486 certified by Jiangsu Association for Science and Technology.

487 Female CD-1 mice (n = 6 per group) were firstly treated by cyclophosphamide with 150  
488 mg/kg in the 4 days before infection, and 100 mg/kg in the 1 day before infection. MRSA  
489 T144 or *E. coli* B2 suspension (100  $\mu$ L,  $10^5$  CFUs per mouse) was injected into the right  
490 thighs of mice. After 2 h post infection, mice were intraperitoneally injected with PBS,  
491 doxycycline (50 mg/kg), benzydamine (50 mg/kg), or combinations (50 + 10 mg/kg, 50 + 50  
492 mg/kg). At 48 h post infection, mice were euthanized by cervical dislocation. The right thigh  
493 muscle was aseptically removed, homogenized, serially diluted and plated on LBA to count  
494 bacterial numbers.

495

#### 496 **Statistical analyses**

497 Statistical analysis was performed using GraphPad Prism version 8.3.0. All data was shown  
498 as mean  $\pm$  SD. Unpaired *t*-test between two groups or one-way ANOVA among multiple  
499 groups were used to calculate *P*-values (\**P* < 0.05, \*\**P* < 0.01, \*\*\**P* < 0.001).

500

501 **Acknowledgments**

502 This work was supported by the National Natural Science Foundation of China (32002331),  
503 National Key Research and Development Program of China (2018YFA0903400), Natural  
504 Science Foundation of Jiangsu Province of China (BK20190893), Agricultural Science and  
505 Technology Independent Innovation Fund of Jiangsu Province (CX(20)3091), China  
506 Postdoctoral Science Foundation funded project (2019M651984), A Project Funded by the  
507 Priority Academic Program Development of Jiangsu Higher Education Institutions (PAPD)  
508 and Lift Engineering of Young Talents of Jiangsu Association for Science and Technology.

509

510 **Author contributions**

511 Z.W. and Y.L. design and conceived the project. Z.T., J. S., T. D. and Y.J. performed all  
512 experiments. Y.L., Z.T., R.L. and X.X. analyzed the data. Y.L. and Z. T. wrote the  
513 manuscript. All authors read and approved the manuscript.

514

515 **Conflict of interest**

516 The authors have declared that no competing interest exists.

517

518 **Additional files**

- 519 ● **Source data 1.** Bacterial strains used in this study.
- 520 ● **Source data 2.** Differentially expressed genes (DEGs) of *E. coli* B2 treated with  
521 doxycycline plus benzydamine.
- 522 ● **Transparent reporting form**

523

524 **References**

- 525 Aranda A, Sequedo L, Tolosa L, Quintas G, Burello E, Castell JV, and Gombau L. 2013.  
526 Dichloro-dihydro-fluorescein diacetate (DCFH-DA) assay: a quantitative method for  
527 oxidative stress assessment of nanoparticle-treated cells. *Toxicology in Vitro* **27**:954-963.
- 528 Avorn J. 2015. The \$2.6 billion pill--methodologic and policy considerations. *The New*  
529 *England journal of medicine* **372**:1877-1879.
- 530 Avvisati R, Meringolo M, Stendardo E, Malavasi E, Marinelli S, and Badiani A. 2018.  
531 Intravenous self-administration of benzydamine, a non-steroidal anti-inflammatory drug  
532 with a central cannabinoidergic mechanism of action. *Addiction Biology* **23**:610-619.
- 533 Boura M, Brensone D, and Karatzas KAG. 2020. A novel role for the glutamate  
534 decarboxylase system in *Listeria monocytogenes*; protection against oxidative stress.  
535 *Food Microbiology* **85**:103284.
- 536 Brunelle BW, Bearson BL, Bearson SMD, and Casey TA. 2017. Multidrug-resistant  
537 *Salmonella enterica* serovar Typhimurium isolates are resistant to antibiotics that  
538 influence their swimming and swarming motility. *mSphere* **2**:e00306-17.
- 539 Chen H, Wang L, Su CX, Gong GH, Wang P, and Yu ZL. 2008. Isolation and characterization  
540 of lipopeptide antibiotics produced by *Bacillus subtilis*. *Letters in Applied Microbiology*  
541 **47**:180-186.
- 542 Chopra I, and Roberts M. 2001. Tetracycline antibiotics: mode of action, applications,  
543 molecular biology, and epidemiology of bacterial resistance. *Microbiology and*  
544 *Molecular Biology Reviews* **65**:232-260.
- 545 De AB, Riool M, Cordfunke RA, Malanovic N, De LB, Koning RI, Ravensbergen E, Franken  
546 M, Van TDH, and Boekema BK. 2018. The antimicrobial peptide SAAP-148 combats  
547 drug-resistant bacteria and biofilms. *Science Translational Medicine* **10**:ean4044.
- 548 De Oliveira DMP, Forde BM, Kidd TJ, Harris PNA, Schembri MA, Beatson SA, Paterson DL,  
549 and Walker MJ. 2020. Antimicrobial resistance in ESKAPE pathogens. *Clinical*  
550 *Microbiology Reviews* **33**:e00181-19.
- 551 DiMasi JA, Grabowski HG, and Hansen RW. 2016. Innovation in the pharmaceutical industry:  
552 New estimates of R&D costs. *Journal of Health Economics* **47**:20-33.

- 553 Ejim L, Farha MA, Falconer SB, Wildenhain J, Coombes BK, Tyers M, Brown ED, and  
554 Wright GD. 2011. Combinations of antibiotics and nonantibiotic drugs enhance  
555 antimicrobial efficacy. *Nature Chemical Biology* **7**:348.
- 556 Falagas ME, and Karageorgopoulos DE. 2008. Pandrug resistance (PDR), extensive drug  
557 resistance (XDR), and multidrug resistance (MDR) among Gram-negative bacilli: need  
558 for international harmonization in terminology. *Clinical Infectious Diseases*  
559 **46**:1121-1122.
- 560 Farha MA, French S, Stokes JM, and Brown ED. 2018. Bicarbonate alters bacterial  
561 susceptibility to antibiotics by targeting the proton motive force. *ACS Infectious Diseases*  
562 **4**:382-390.
- 563 Farha MA, Verschoor CP, Bowdish D, and Brown ED. 2013. Collapsing the proton motive  
564 force to identify synergistic combinations against *Staphylococcus aureus*. *Chemistry and*  
565 *Biology* **20**:1168-1178.
- 566 Feehily C, and Karatzas KAG. 2013. Role of glutamate metabolism in bacterial responses  
567 towards acid and other stresses. *Journal of Applied Microbiology* **114**:11-24.
- 568 Forster S, Thumser AE, Hood SR, and Plant N. 2012. Characterization of rhodamine-123 as a  
569 tracer dye for use in *in vitro* drug transport assays. *PLoS One* **7**:e33253.
- 570 Gupta N, Limbago BM, Patel JB, and Kallen AJ. 2011. Carbapenem-resistant  
571 Enterobacteriaceae: epidemiology and prevention. *Clinical Infectious Diseases* **53**:60-67.
- 572 Hall CW, and Mah T-F. 2017. Molecular mechanisms of biofilm-based antibiotic resistance  
573 and tolerance in pathogenic bacteria. *FEMS Microbiology Reviews* **41**:276-301.
- 574 Harrison E, and Brockhurst MA. 2012. Plasmid-mediated horizontal gene transfer is a  
575 coevolutionary process. *Trends in Microbiology* **20**:262-267.
- 576 Hawkey PM. 2008. Pre-clinical experience with daptomycin. *Journal of Antimicrobial*  
577 *Chemotherapy* **62 Suppl 3**:iii7-14.
- 578 He T, Wang R, Liu D, Walsh TR, Zhang R, Lv Y, Ke Y, Ji Q, Wei R, and Liu Z. 2019.  
579 Emergence of plasmid-mediated high-level tigecycline resistance genes in animals and  
580 humans. *Nature Microbiology* **4**:1450-1456.
- 581 Imai Y, Meyer KJ, Iinishi A, Favre-Godal Q, Green R, Manuse S, Caboni M, Mori M, Niles S,

- 582 Ghiglieri M, Honrao C, Ma X, Guo J, Makriyannis A, Linares-Otoya L, Böhringer N,  
583 Wuisan ZG, Kaur H, Wu R, Mateus A, Typas A, Savitski MM, Espinoza JL, O'Rourke A,  
584 Nelson KE, Hiller S, Noinaj N, Schäberle TF, D'Onofrio A, and Lewis K. 2019. A new  
585 antibiotic selectively kills Gram-negative pathogens. *Nature* **576**:459-464.
- 586 Clinical and Laboratory Standards Institute. 2018. Performance standards for antimicrobial  
587 susceptibility testing. *CLSI*.
- 588 Lakshmaiah Narayana J, Mishra B, Lushnikova T, Wu Q, Chhonker YS, Zhang Y, Zarena D,  
589 Salnikov ES, Dang X, Wang F, Murphy C, Foster KW, Gorantla S, Bechinger B, Murry  
590 DJ, and Wang G. 2020. Two distinct amphipathic peptide antibiotics with systemic  
591 efficacy. *Proceedings of the National Academy of Sciences* **117**:19446-19454.
- 592 Lewis K. 2020. The science of antibiotic discovery. *Cell* **181**:29-45.
- 593 Liu Y-Y, Wang Y, Walsh TR, Yi L-X, Zhang R, Spencer J, Doi Y, Tian G, Dong B, Huang X,  
594 Yu L-F, Gu D, Ren H, Chen X, Lv L, He D, Zhou H, Liang Z, Liu J-H, and Shen J. 2016.  
595 Emergence of plasmid-mediated colistin resistance mechanism MCR-1 in animals and  
596 human beings in China: a microbiological and molecular biological study. *The Lancet  
597 Infectious Diseases* **16**:161-168.
- 598 Liu Y, Ding S, Dietrich R, Märklbauer E, and Zhu K. 2017. A biosurfactant-inspired  
599 heptapeptide with improved specificity to kill MRSA. *Angewandte Chemie International  
600 Edition* **56**:1486-1490.
- 601 Liu Y, Ding S, Shen J, and Zhu K. 2019a. Nonribosomal antibacterial peptides that target  
602 multidrug-resistant bacteria. *Natural Product Reports* **36**:573-592.
- 603 Liu Y, Jia Y, Yang K, Li R, Xiao X, and Wang Z. 2020a. Anti-HIV agent azidothymidine  
604 decreases Tet(X)-mediated bacterial resistance to tigecycline in *Escherichia coli*.  
605 *Communications biology* **3**:162.
- 606 Liu Y, Jia Y, Yang K, Li R, Xiao X, Zhu K, and Wang Z. 2020b. Metformin Restores  
607 Tetracyclines Susceptibility against Multidrug Resistant Bacteria. *Advanced Science*  
608 **7**:1902227.
- 609 Liu Y, Jia Y, Yang K, Tong Z, Shi J, Li R, Xiao X, Ren W, Hardeland R, Reiter RJ, and Wang  
610 Z. 2020c. Melatonin overcomes MCR-mediated colistin resistance in Gram-negative



- 611 pathogens. *Theranostics* **10**:10697-10711.
- 612 Liu Y, Li R, Xiao X, and Wang Z. 2019b. Antibiotic adjuvants: an alternative approach to  
613 overcome multi-drug resistant Gram-negative bacteria. *Critical Reviews in Microbiology*  
614 **45**:301-314.
- 615 Liu Y, Shi J, Tong Z, Jia Y, Yang K, and Wang Z. 2020d. Potent broad-spectrum antibacterial  
616 activity of amphiphilic peptides against multidrug-resistant bacteria. *Microorganisms*  
617 **8**:1398.
- 618 Luther A, Urfer M, Zahn M, Müller M, Wang S-Y, Mondal M, Vitale A, Hartmann J-B,  
619 Sharpe T, and Monte FL. 2019. Chimeric peptidomimetic antibiotics against  
620 Gram-negative bacteria. *Nature* **576**:452-458.
- 621 Ma Y-X, Wang C-Y, Li Y-Y, Li J, Wan Q-Q, Chen J-H, Tay FR, and Niu L-N. 2020.  
622 Considerations and caveats in combating ESKAPE pathogens against nosocomial  
623 infections. *Advanced Science* **7**:1901872.
- 624 Magiorakos AP, Srinivasan A, Carey RB, Carmeli Y, Falagas ME, Giske CG, Harbarth S,  
625 Hindler JF, Kahlmeter G, Olsson-Liljequist B, Paterson DL, Rice LB, Stelling J,  
626 Struelens MJ, Vatopoulos A, Weber JT, and Monnet DL. 2012. Multidrug-resistant,  
627 extensively drug-resistant and pandrug-resistant bacteria: an international expert  
628 proposal for interim standard definitions for acquired resistance. *Clinical Microbiology*  
629 *and Infection* **18**:268-281.
- 630 Mitchell P. 2011. Chemiosmotic coupling in oxidative and photosynthetic phosphorylation.  
631 1966. *Biochimica et Biophysica Acta* **1807**:1507-1538.
- 632 Nettis E, Di Paola R, Napoli G, Ferrannini A, and Tursi A. 2002. Benzydamine: an alternative  
633 nonsteroidal anti-inflammatory drug in patients with nimesulide-induced urticaria.  
634 *Allergy* **57**:442-445.
- 635 Ozkan P, and Mutharasan R. 2002. A rapid method for measuring intracellular pH using  
636 BCECF-AM. *Biochimica et Biophysica Acta* **1572**:143-148.
- 637 Paul K, Erhardt M, Hirano T, Blair DF, and Hughes KT. 2008. Energy source of flagellar type  
638 III secretion. *Nature* **451**:489-492.
- 639 Rastogi M, Khurana R, Revannasiddaiah S, Jaiswal I, Nanda SS, Gupta P, Chufal KS, and

- 640 Bhatt ML. 2017. Role of benzydamine hydrochloride in the prevention of oral mucositis  
641 in head and neck cancer patients treated with radiotherapy (>50 Gy) with or without  
642 chemotherapy. *Supportive Care in Cancer* **25**:1439-1443.
- 643 Segall MD, and Barber C. 2014. Addressing toxicity risk when designing and selecting  
644 compounds in early drug discovery. *Drug Discovery Today* **19**:688-693.
- 645 Son HS, Lee J, Lee HI, Kim N, Jo YJ, Lee GR, Hong SE, Kwon M, Kim NY, Kim HJ, Park  
646 JH, Lee SY, and Jeong W. 2020. Benzydamine inhibits osteoclast differentiation and  
647 bone resorption via down-regulation of interleukin-1 $\beta$  expression. *Acta Pharmaceutica*  
648 *Sinica B* **10**:462-474.
- 649 Song M, Liu Y, Huang X, Ding S, Wang Y, Shen J, and Zhu K. 2020. A broad-spectrum  
650 antibiotic adjuvant reverses multidrug-resistant Gram-negative pathogens. *Nature*  
651 *Microbiology* **5**:1040-1050.
- 652 Stokes JM, Yang K, Swanson K, Jin W, Cubillos-Ruiz A, Donghia NM, MacNair CR, French  
653 S, Carfrae LA, Bloom-Ackerman Z, Tran VM, Chiappino-Pepe A, Badran AH, Andrews  
654 IW, Chory EJ, Church GM, Brown ED, Jaakkola TS, Barzilay R, and Collins JJ. 2020. A  
655 deep learning approach to antibiotic discovery. *Cell* **180**:688-702.
- 656 Sun J, Chen C, Cui CY, Zhang Y, Liu X, Cui ZH, Ma XY, Feng Y, Fang LX, Lian XL, Zhang  
657 RM, Tang YZ, Zhang KX, Liu HM, Zhuang ZH, Zhou SD, Lv JN, Du H, Huang B, Yu  
658 FY, Mathema B, Kreiswirth BN, Liao XP, Chen L, and Liu YH. 2019. Plasmid-encoded  
659 *tet(X)* genes that confer high-level tigecycline resistance in *Escherichia coli*. *Nature*  
660 *Microbiology* **4**:1457-1464.
- 661 Taber HW, Mueller JP, Miller PF, and Arrow AS. 1987. Bacterial uptake of aminoglycoside  
662 antibiotics. *Microbiological Reviews* **51**:439-457.
- 663 Tyers M, and Wright GD. 2019. Drug combinations: a strategy to extend the life of antibiotics  
664 in the 21st century. *Nature Reviews Microbiology* **17**:141-155.
- 665 Voorhees AJMaKJ. 2003. Detection of cyclic lipopeptide biomarkers from *Bacillus* Species  
666 using atmospheric pressure matrix-assisted laser desorption/ionization mass spectrometry.  
667 *Analytical Chemistry* **75**:1628-1673.
- 668 Wright GD. 2016. Antibiotic adjuvants: rescuing antibiotics from resistance. *Trends In*

- 669        *Microbiology* **24**:862-871.
- 670    Yamaguchi A, Ohmori H, Kaneko-Ohdera M, Nomura T, and Sawai T. 1991. Delta
- 671        pH-dependent accumulation of tetracycline in *Escherichia coli*. *Antimicrobial Agents*
- 672        *and Chemotherapy* **35**:53-56.
- 673    Yan J, and Bassler BL. 2019. Surviving as a community: antibiotic tolerance and persistence
- 674        in bacterial biofilms. *Cell Host & Microbe* **26**:15-21.
- 675    Zhou Y-F, Liu P, Dai S-H, Sun J, Liu Y-H, and Liao X-P. 2020. Activity of tigecycline or
- 676        colistin in combination with zidovudine against harboring *tet(X)* and *mcr-I*.
- 677        *Antimicrobial Agents and Chemotherapy* **65**:e01172-01120.
- 678

## 679 Figures

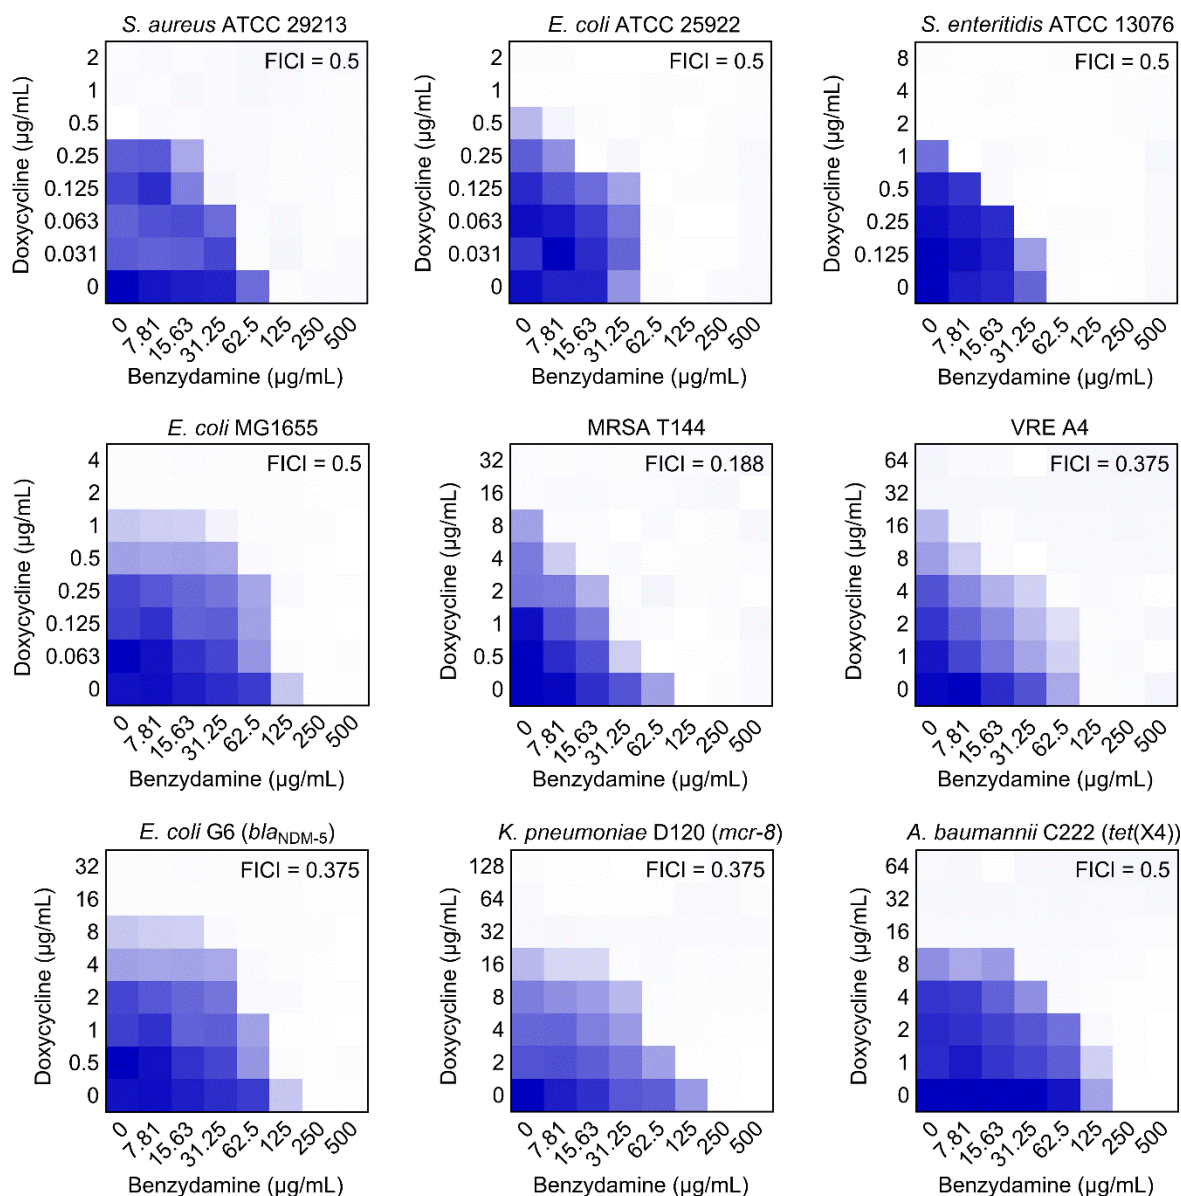

680

681 **Figure 1. Synergistic activity between benzydamine and doxycycline against**  
682 **drug-sensitive and resistant bacteria by checkerboard assay, related to Table S3.**

683 Dark blue regions represent higher cell density. Data represent the mean OD<sub>600 nm</sub> of two  
684 biological replicates. Synergy is defined with FIC index  $\leq 0.5$

685 **This article includes the following four figure supplements for figure 1:**

686

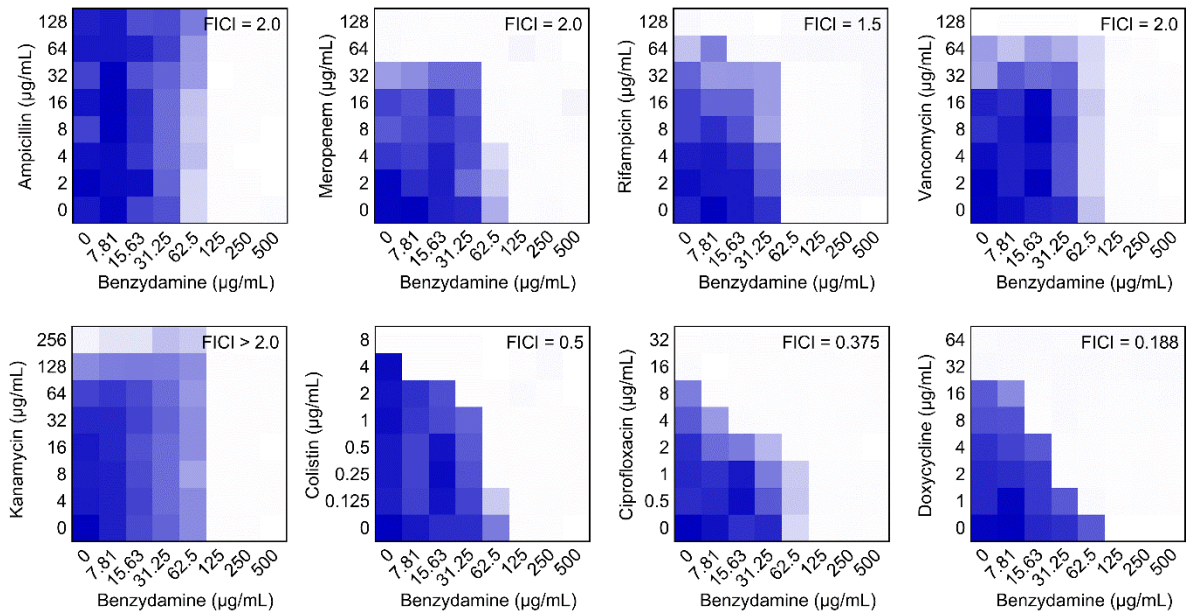

687

688 **Figure 1-figure supplement 1. Interaction between benzydamine and multiple classes of**  
689 **antibiotics against *E. coli* B2 by checkerboard assay, related to Table S2.**

690 Dark blue regions represent higher cell density. Data represent the mean OD (600 nm) of two  
691 biological replicates.

692

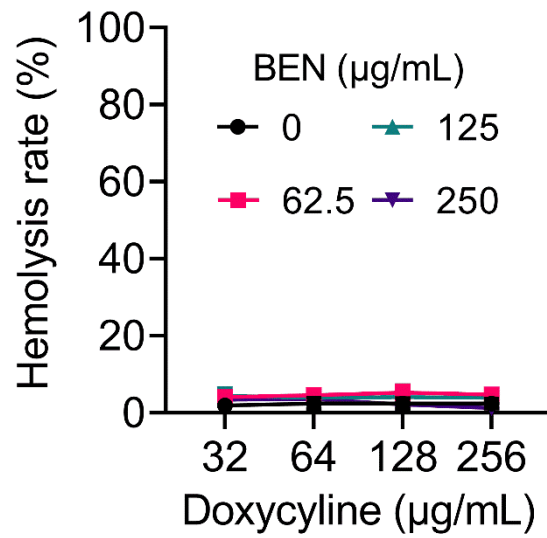

693

694 **Figure 1-figure supplement 2. Doxycycline plus benzydamine displays negligible**

695 **hemolytic activity on mammals' RBCs.** Phosphate buffer saline (PBS) and double-distilled

696 water were used as negative and positive control, respectively.

697

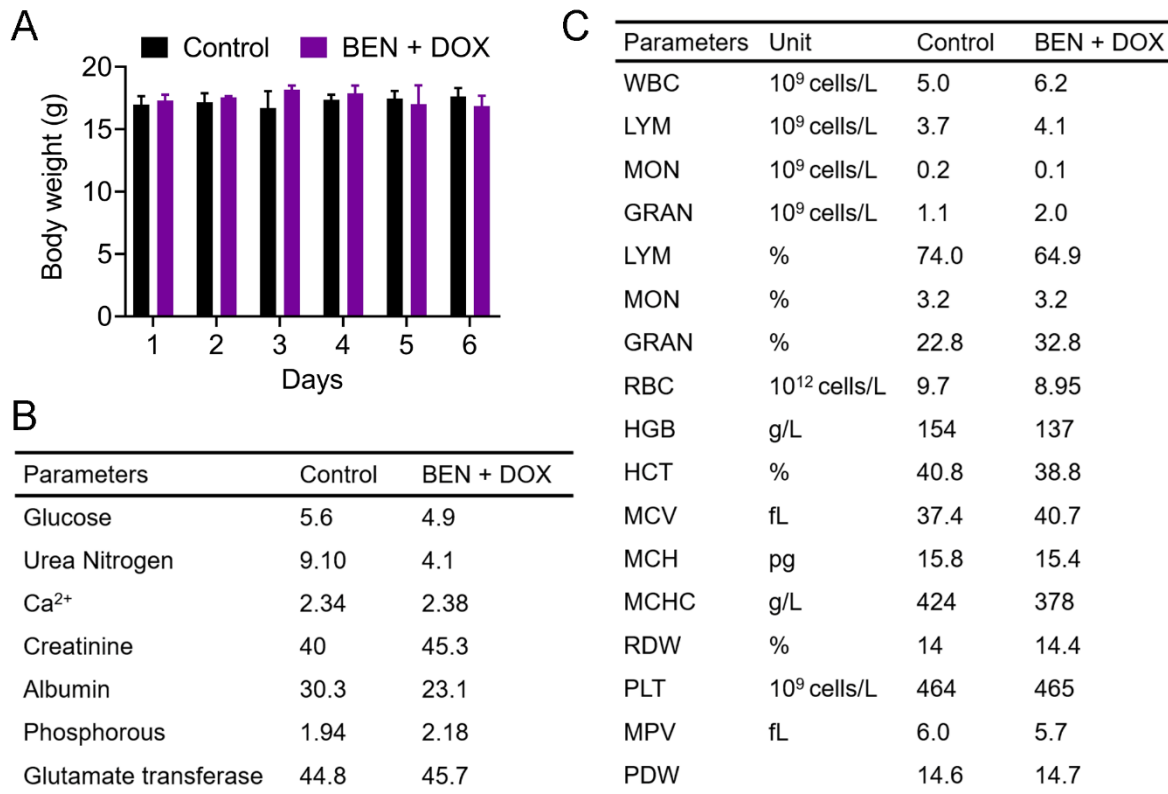

698

699

700 **Figure 1-figure supplement 3. *In vivo* toxicity evaluation of the combination of**  
 701 **benzydamine and doxycycline.**

702 CD-1 female mice (n = 6 per group) were gavaged with vehicle or the  
 703 benzydamine-doxycycline combination once daily for six days. Meanwhile, the mice body  
 704 weight (A), serum biochemical analysis (B) and whole-blood cell analysis (C) were shown.  
 705 The data were presented as mean.

706 White blood cell (WBC), lymphocyte (LYM), monocyte (MON), neutrophils (NEU), red  
 707 blood cell (RBC), hemoglobin (HGB), hematocrit (HCT = RBC%), the mean corpuscular  
 708 volume (MCV, average volume of red cells), mean corpuscular hemoglobin (MCH), platelet  
 709 count (PLT), and mean corpuscular hemoglobin concentration (MCHC, the average amount  
 710 of hemoglobin inside a single red blood cell).

711

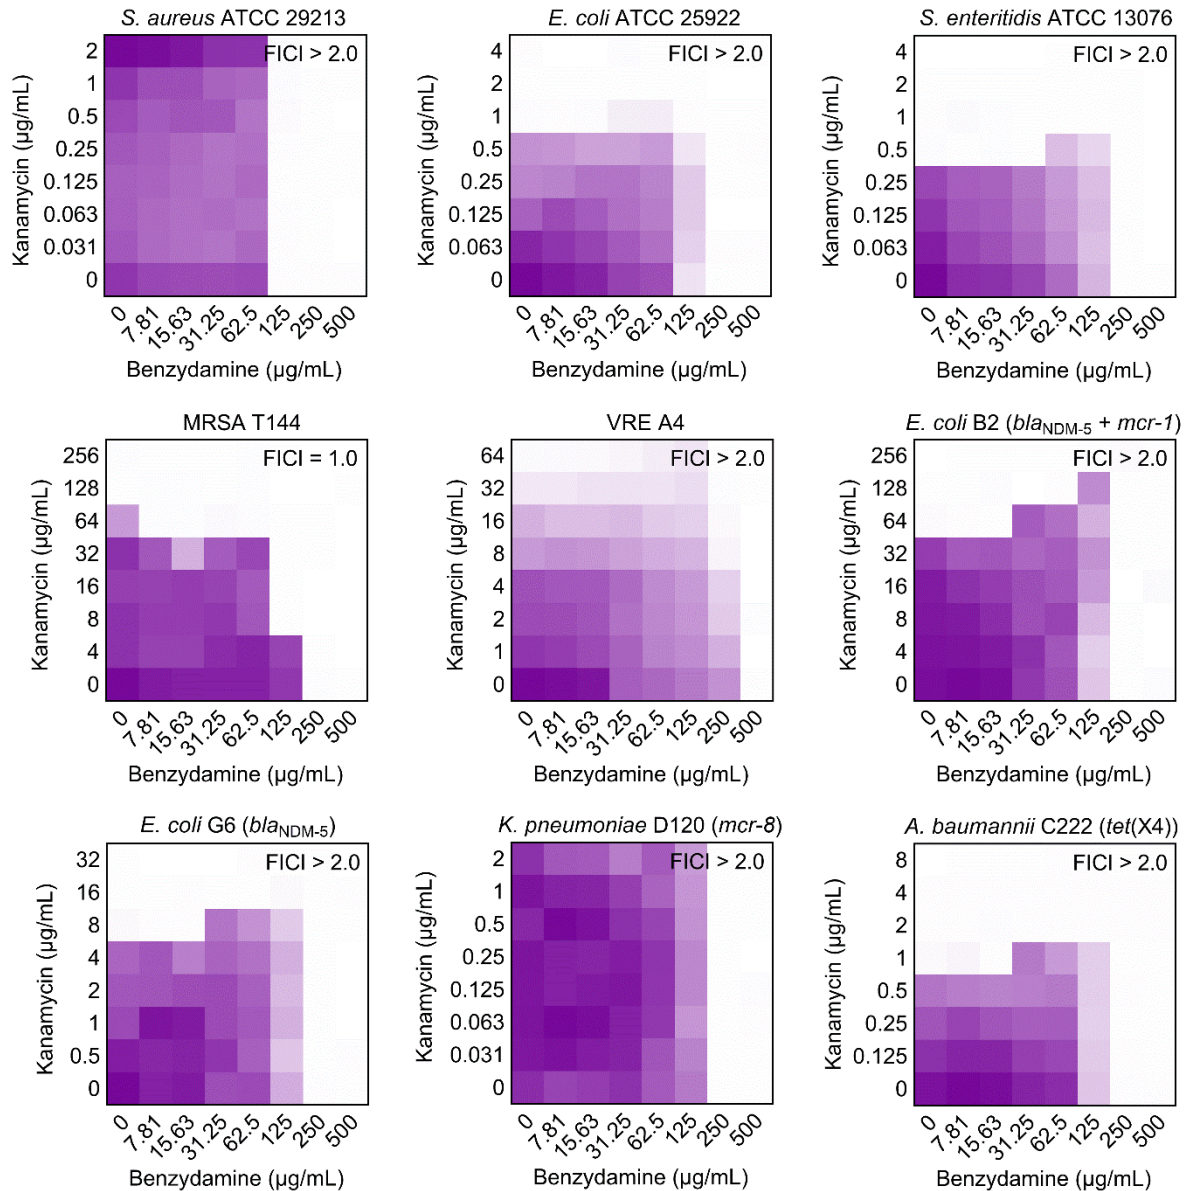

712

713 **Figure 1-figure supplement 4. Antagonism effect of benzydamine in combination with**

714 **kanamycin in both kanamycin-sensitive and resistant bacteria.**

715 Dark blue represents greater growth. Data represent the mean OD (600 nm) of two biological

716 replicates.

717



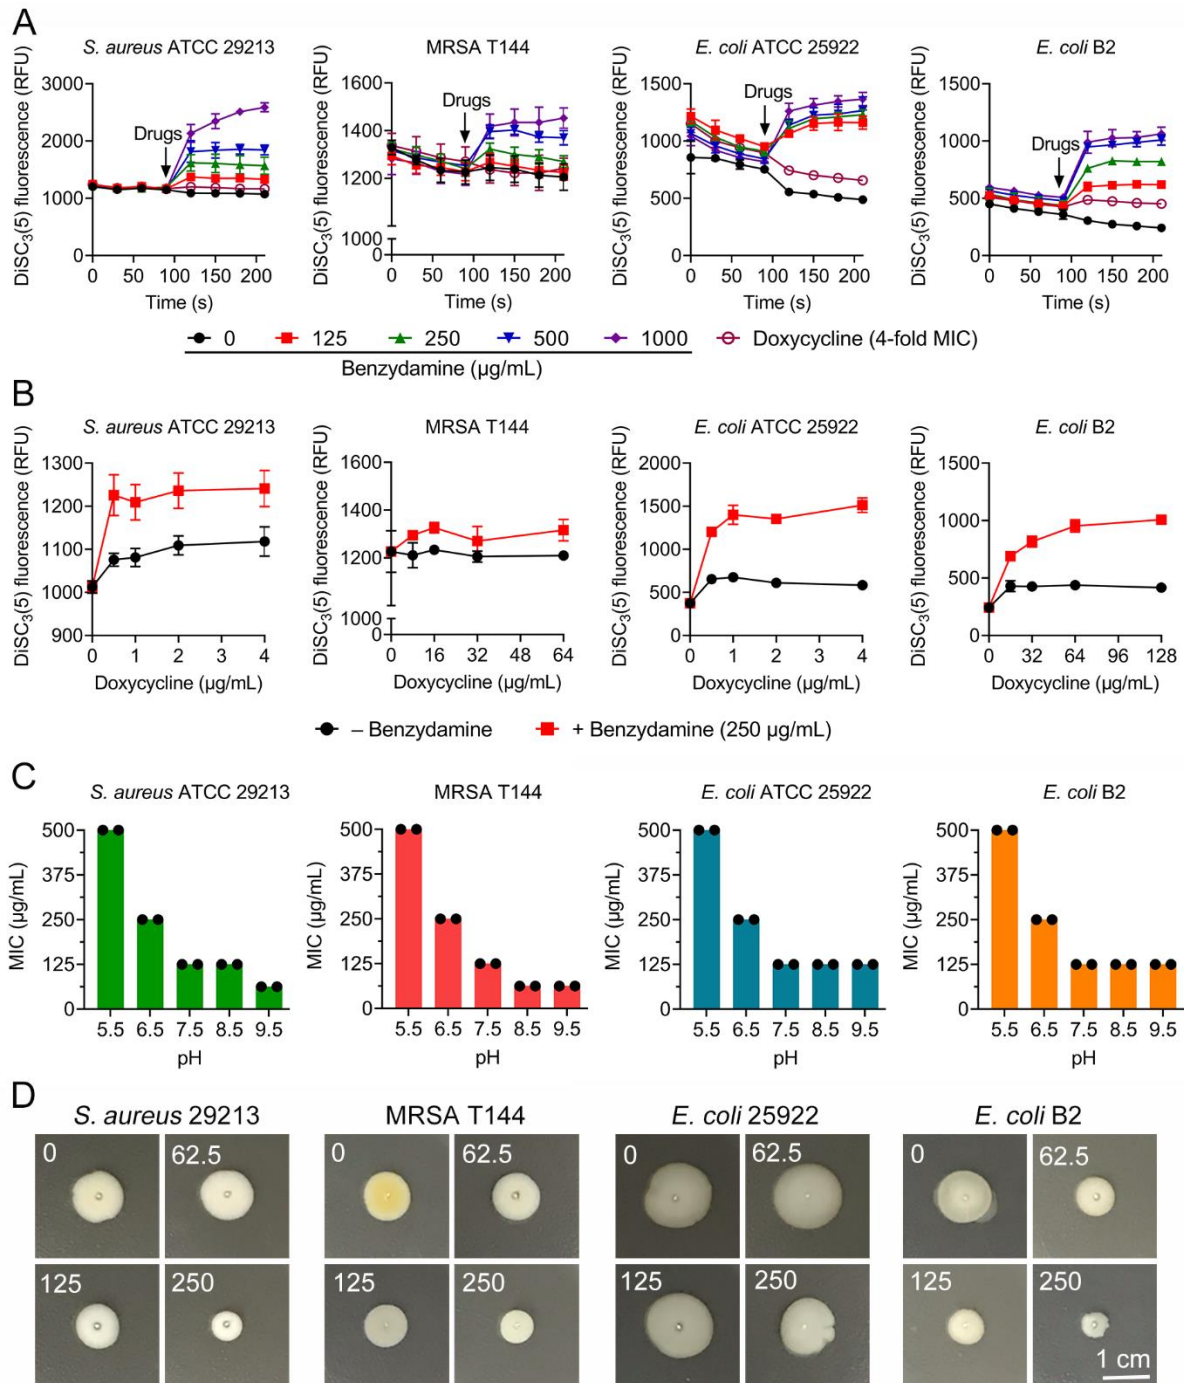

718

719 **Figure 2. Benzylamine disrupts proton motive force (PMF) in both Gram-positive and**  
 720 **Gram-negative bacteria.**

721 (A) Benzylamine dissipates membrane potential in bacteria. Fluorescence intensity of  
 722 DiSC<sub>3</sub>(5) in *S. aureus* ATCC 29213, MRSA T144, *E. coli* ATCC 25922 and *E. coli* B2 after  
 723 treatment with increasing concentrations of benzylamine and doxycycline (4-fold MIC) was  
 724 monitored. Drugs were added into DiSC<sub>3</sub>(5)-probed cells at 90 s.

725 **(B)** Combination of doxycycline and benzydamine (250  $\mu\text{g}/\text{mL}$ ) displays increased disruption  
726 on membrane potential compared with doxycycline alone.

727 **(C)** Decreased MIC values of benzydamine against four bacteria in alkaline environment.  
728  $\Delta\Psi$  becomes the main component of PMF as the external pH is shifted to an alkaline  
729 environment.

730 **(D)** Benzydamine inhibits swimming motility of four bacterial strains. Overnight cultures  
731 were standardized to  $\text{OD}_{600 \text{ nm}}$  of 0.5, and inoculated on 0.3% agar plates for 48 h at 37°C.

732 Scar bar, 1 cm.

733

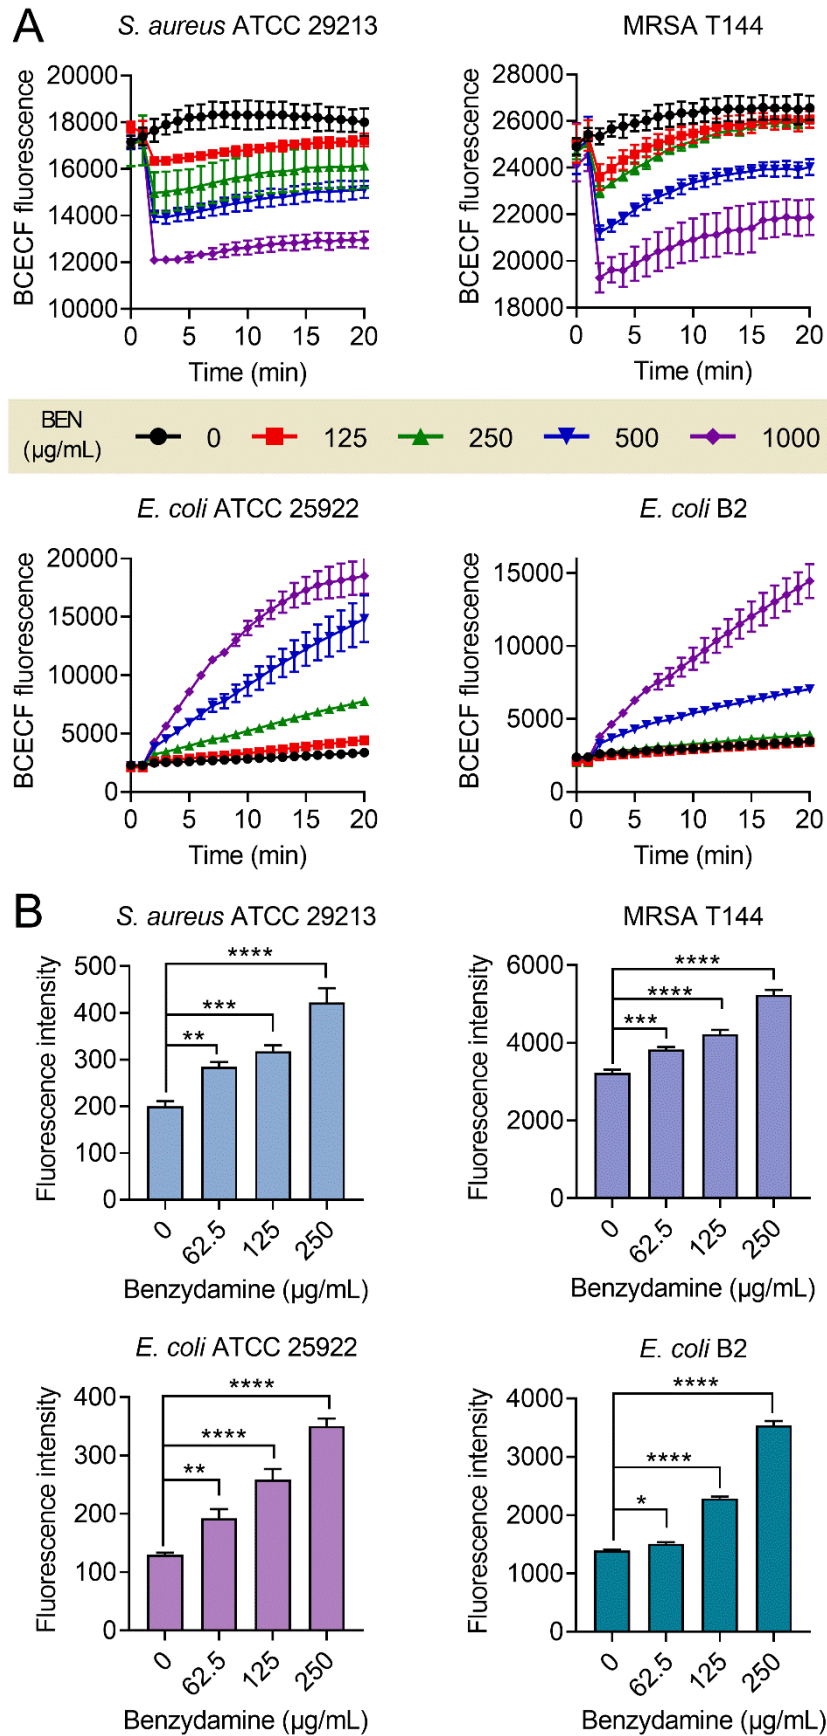

735 **Figure 3. Benzydamine upregulates  $\Delta$ pH and promotes the intracellular accumulation**  
736 **of doxycycline.**

737 **(A)** Upregulation of  $\Delta$ pH in BCECF-AM-labeled bacterial cells after exposure to varying  
738 concentrations of benzydamine. In Gram-positive bacteria, benzydamine decreases  
739 fluorescence and the cytoplasmic pH. In contrast, benzydamine increases fluorescence and  
740 the cytoplasmic pH in Gram-negative bacteria (*E. coli* ATCC 25922 and *E. coli* B2).

741 **(B)** Benzydamine supplementation dose-dependent promotes the intracellular accumulation  
742 of doxycycline in bacteria. Intracellular antibiotic content was determined by monitoring the  
743 fluorescence of doxycycline (excitation wavelength, 405 nm; emission wavelength, 535 nm).  
744 All data were presented as mean  $\pm$  SD, and the significance was determined by  
745 non-parametric one-way ANOVA (\* $P < 0.05$ , \*\* $P < 0.01$ , \*\*\* $P < 0.001$ , \*\*\*\* $P < 0.0001$ ).

746

747

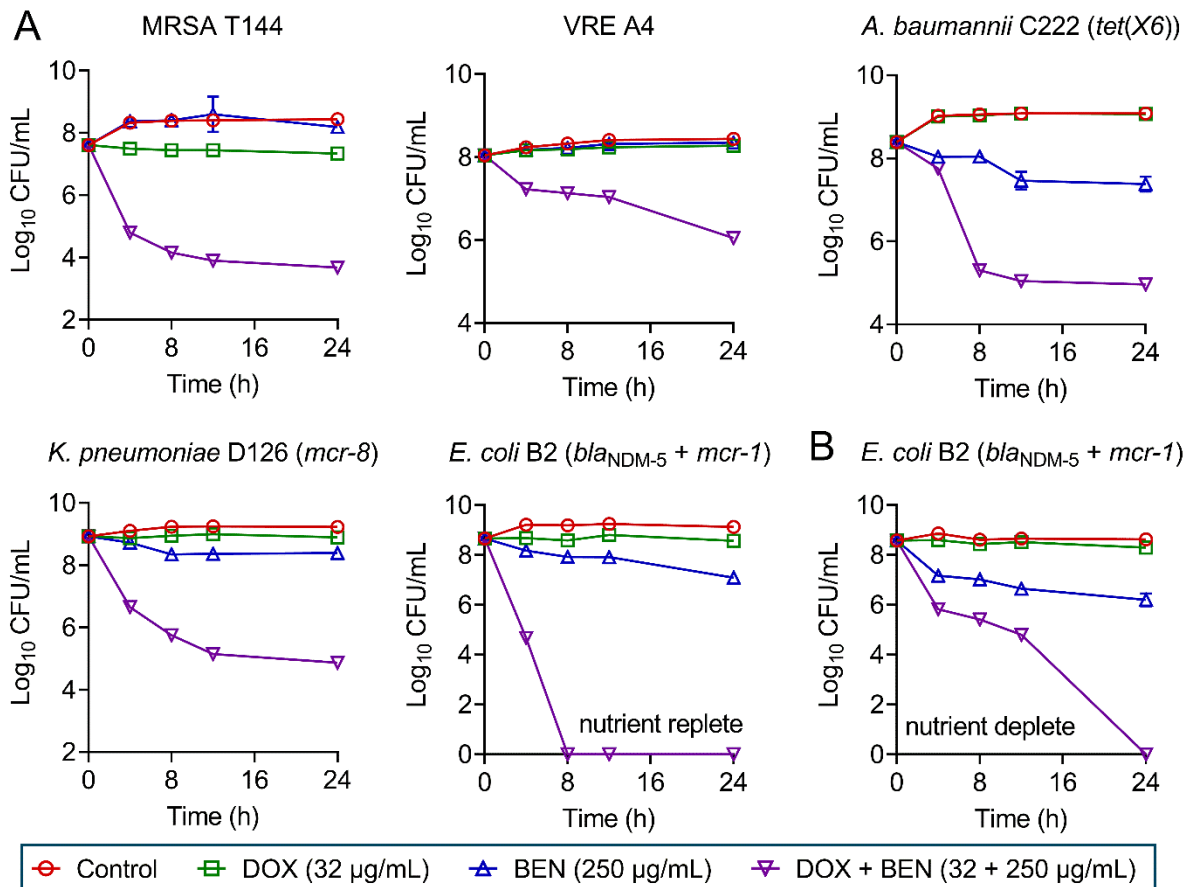

748

749

750 **Figure 4. The combination of doxycycline and benzydamine is bactericidal against**  
 751 **various drug-resistant bacteria.**

752 (A) Killing activity of doxycycline plus benzydamine in LB media against  
 753 multidrug-resistant Gram-positive bacteria (MRSA T144 and VRE A4) and Gram-negative  
 754 bacteria (*A. baumannii* C222, *K. pneumoniae* D126 and *E. coli* B2).

755 (B) Killing activity of doxycycline plus benzydamine in PBS against *E. coli* B2.

756 The initial cell density is about  $10^8$  CFU/mL. All data were performed from three biological  
 757 replicates and shown as mean  $\pm$  SD.

758 **This article includes the following one figure supplement for figure 4:**

759

760

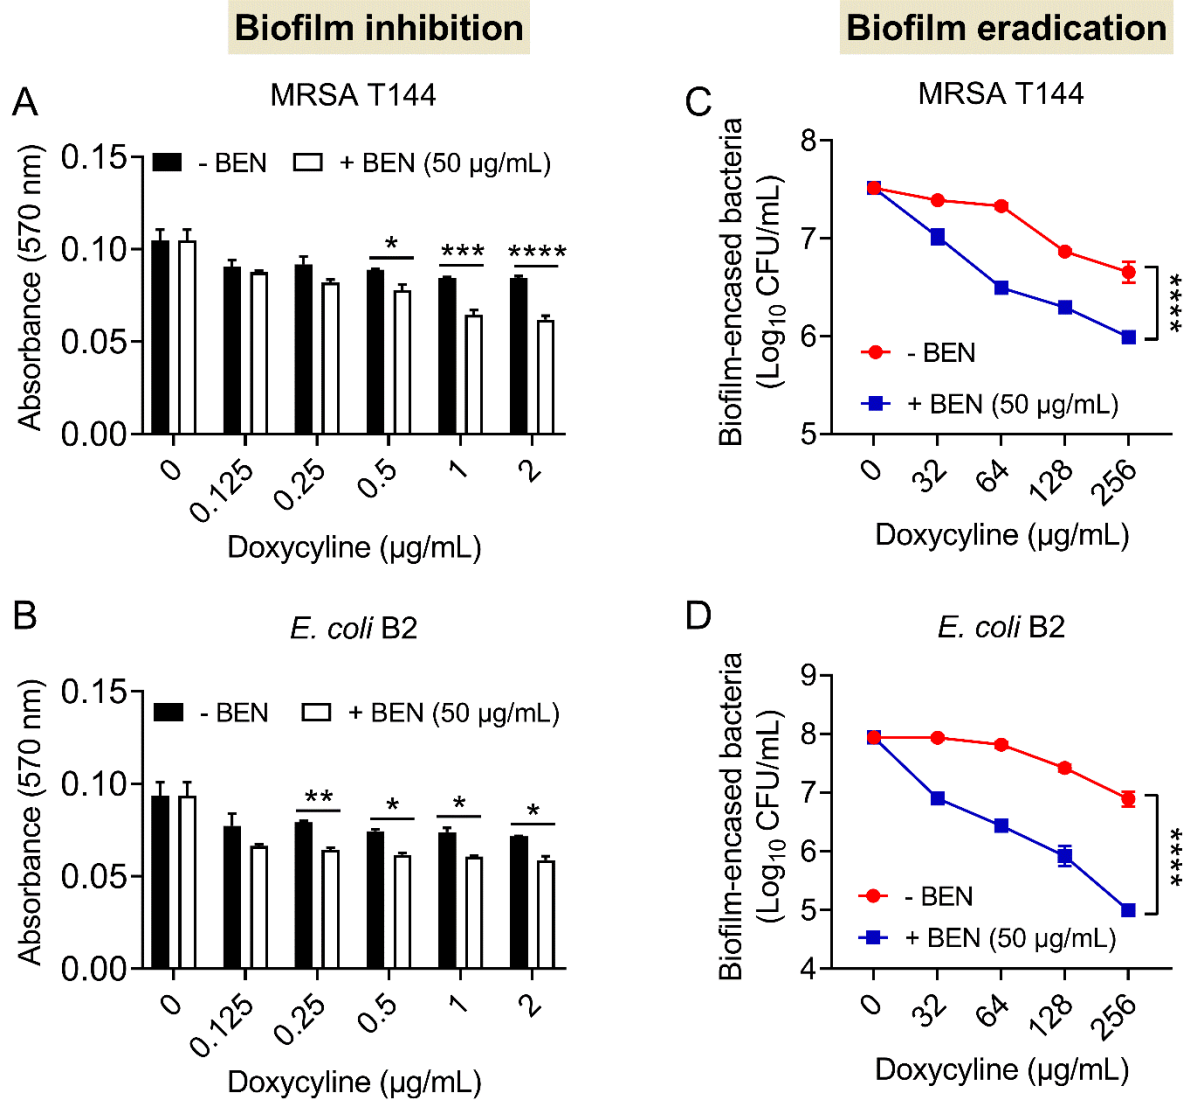

761

762 **Figure 4-figure supplement 1. Benzydamine enhances the biofilm inhibition and**

763 **eradication activities of doxycycline.**

764 **(A and B)** Benzydamine supplementation potentiates the inhibitory effect of doxycycline on

765 MRSA T144 (A) and *E. coli* B2 (B) biofilm formation.

766 **(C and D)** Addition of benzydamine drastically promotes the eradication of established

767 biofilm of MRSA T144 (A) and *E. coli* B2 (B) by doxycycline.

768

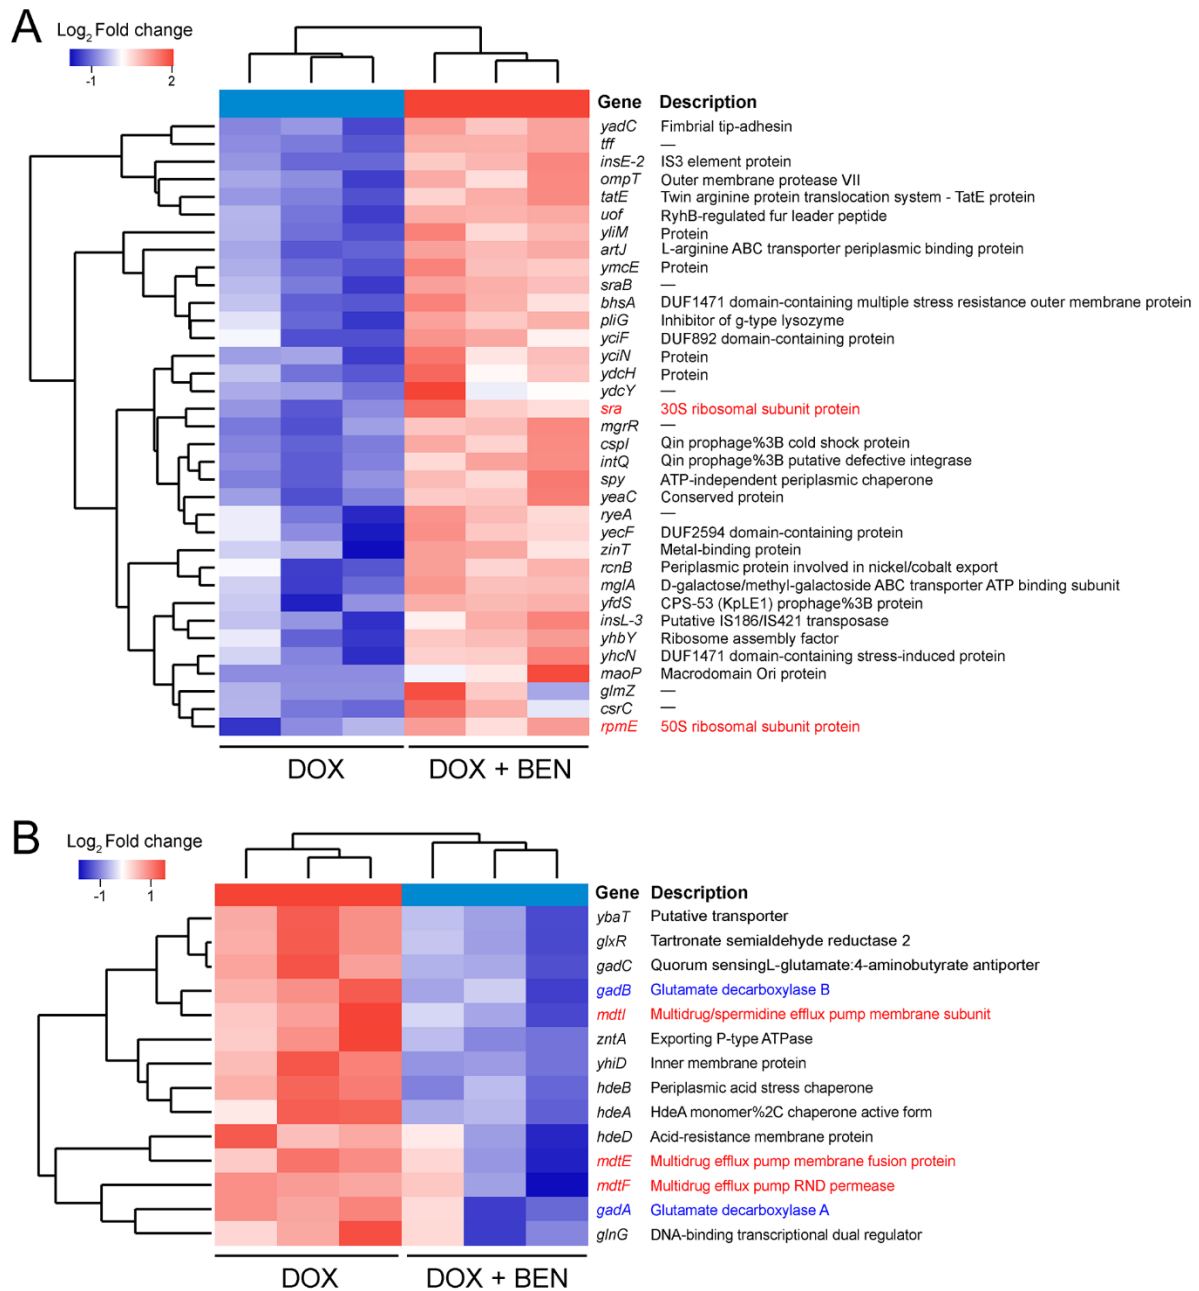

769

770 **Figure 5. Differentially expressed genes (DEGs) of *E. coli* B2 after treatment with**  
 771 **doxycycline plus benzydamine in comparison to doxycycline alone.**

772 Significant up-regulated (A,  $P < 0.05$ ,  $\text{Log}_2\text{Fold change} \geq 1$ ) and down-regulated DEGs (B,  $P$   
 773  $< 0.05$ ,  $\text{Log}_2\text{Fold change} \leq -1$ ) in combination treatment group compared with doxycycline  
 774 monotreatment.

775 **This article includes the following one figure supplement for figure 5:**

776

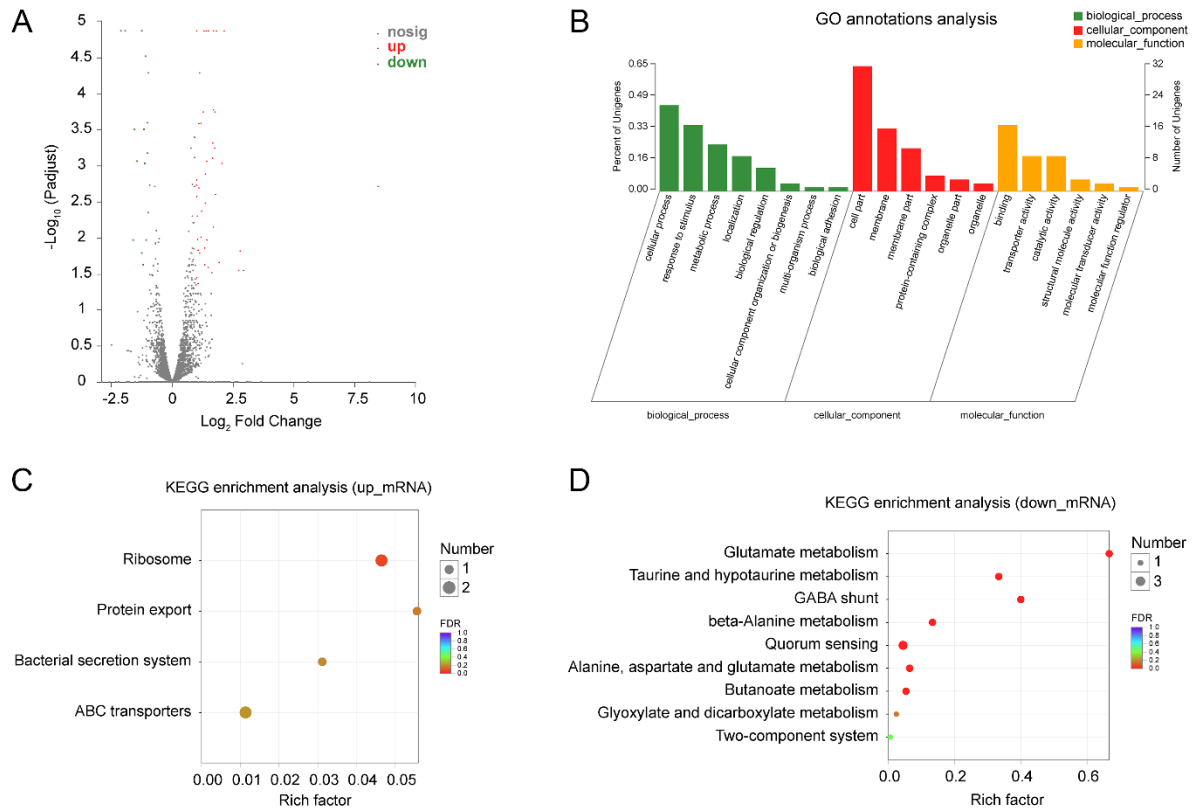

777

778 **Figure 5-figure supplement 1. Transcriptomic analysis of *E. coli* B2 after exposure to**  
 779 **doxycycline or in combination with benzydamine.**

780 (A) Volcano plot and (B) GO (gene ontology) annotation analysis of the differential  
 781 expression genes (DEGs) in *E. coli* B2 after exposing doxycycline (32 µg/mL) or the  
 782 combination of doxycycline (32 µg/mL) plus benzydamine (250 µg/mL) for 4 h. The x- and  
 783 y-axes in (A) represent the expression changes and corresponding statistically significant  
 784 degree, respectively. An adjusted p-value < 0.05 (Student's *t*-test with Benjamini–Hochberg  
 785 false discovery rate adjustment) and  $|\log_2$  Fold change  $\geq 1$  were applied as the cutoff for  
 786 significant DEGs. KEGG (Kyoto Encyclopedia of Genes and Genomes) enrichment analysis  
 787 of (C) upregulated DEGs and (D) downregulated DEGs. The 10 most significant enriched  
 788 pathways are shown.

789

790



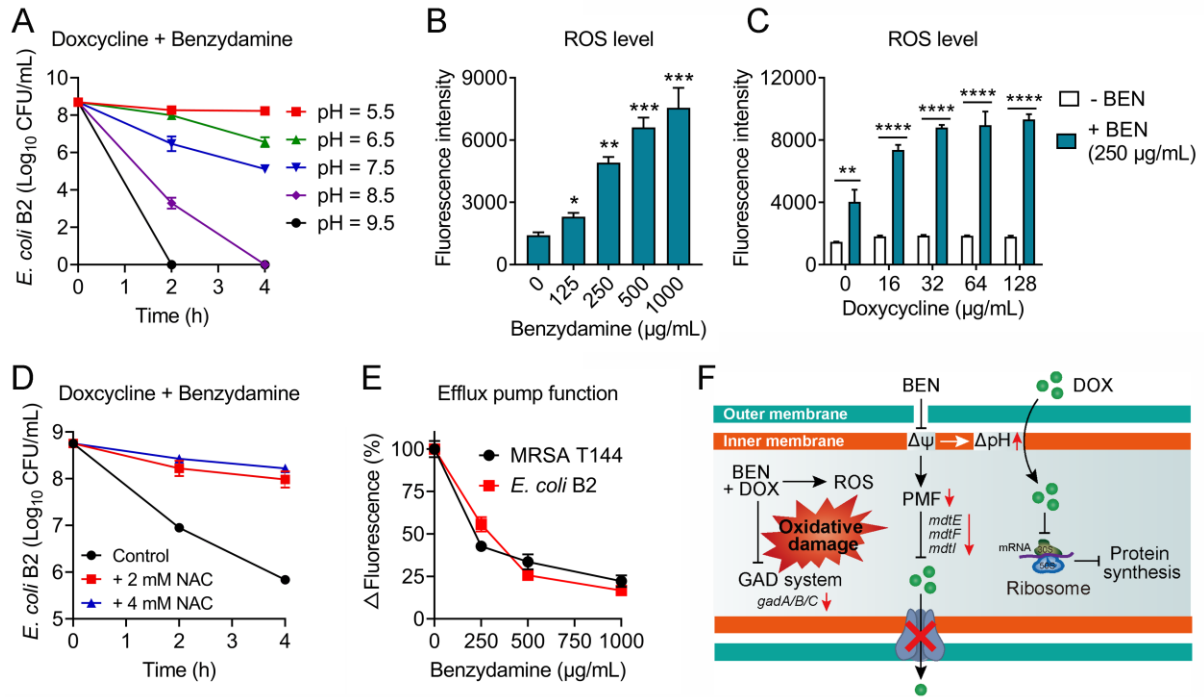

791

792 **Figure 6. Benzylidamine promotes oxidative damage and inhibits the functions of efflux**

793 **pump in *E. coli*.**

794 (A) Time-killing curves of *E. coli* B2 after treatment with the combination of doxycycline

795 and benzylidamine in different pH media from 5.5 to 9.5. (B) Benzylidamine promotes the

796 production of ROS in a dose-dependent manner. (C) Doxycycline plus benzylidamine (250

797 µg/mL) showed higher ROS generation compared to doxycycline alone. Fluorescence probe

798 2',7'-dichlorodihydrofluorescein diacetate (DCFH-DA) was used to monitor the levels of

799 ROS in cells ( $\lambda_{excitation} = 488 \text{ nm}$ ,  $\lambda_{emission} = 525 \text{ nm}$ ). All data were presented as mean  $\pm$

800 SD, and the significance was determined by non-parametric one-way ANOVA (\* $P < 0.05$ ,

801 \*\* $P < 0.01$ , \*\*\* $P < 0.001$ , \*\*\*\* $P < 0.0001$ ). (D) Addition of ROS scavenger *N*-acetylcysteine

802 weakens the potentiation of benzylidamine to doxycycline. (E) Benzylidamine drastically

803 impairs the function of multidrug efflux pumps in both MRSA T144 and *E. coli* B2.

804 Rhodamine B ( $\lambda_{excitation} = 540 \text{ nm}$ ,  $\lambda_{emission} = 625 \text{ nm}$ ) was used to characterize the

805 activity of efflux pumps in bacteria. (F) Schematic illustrations of potentiating mechanisms

806 of benzylidamine with tetracyclines against drug-resistant pathogens.

807

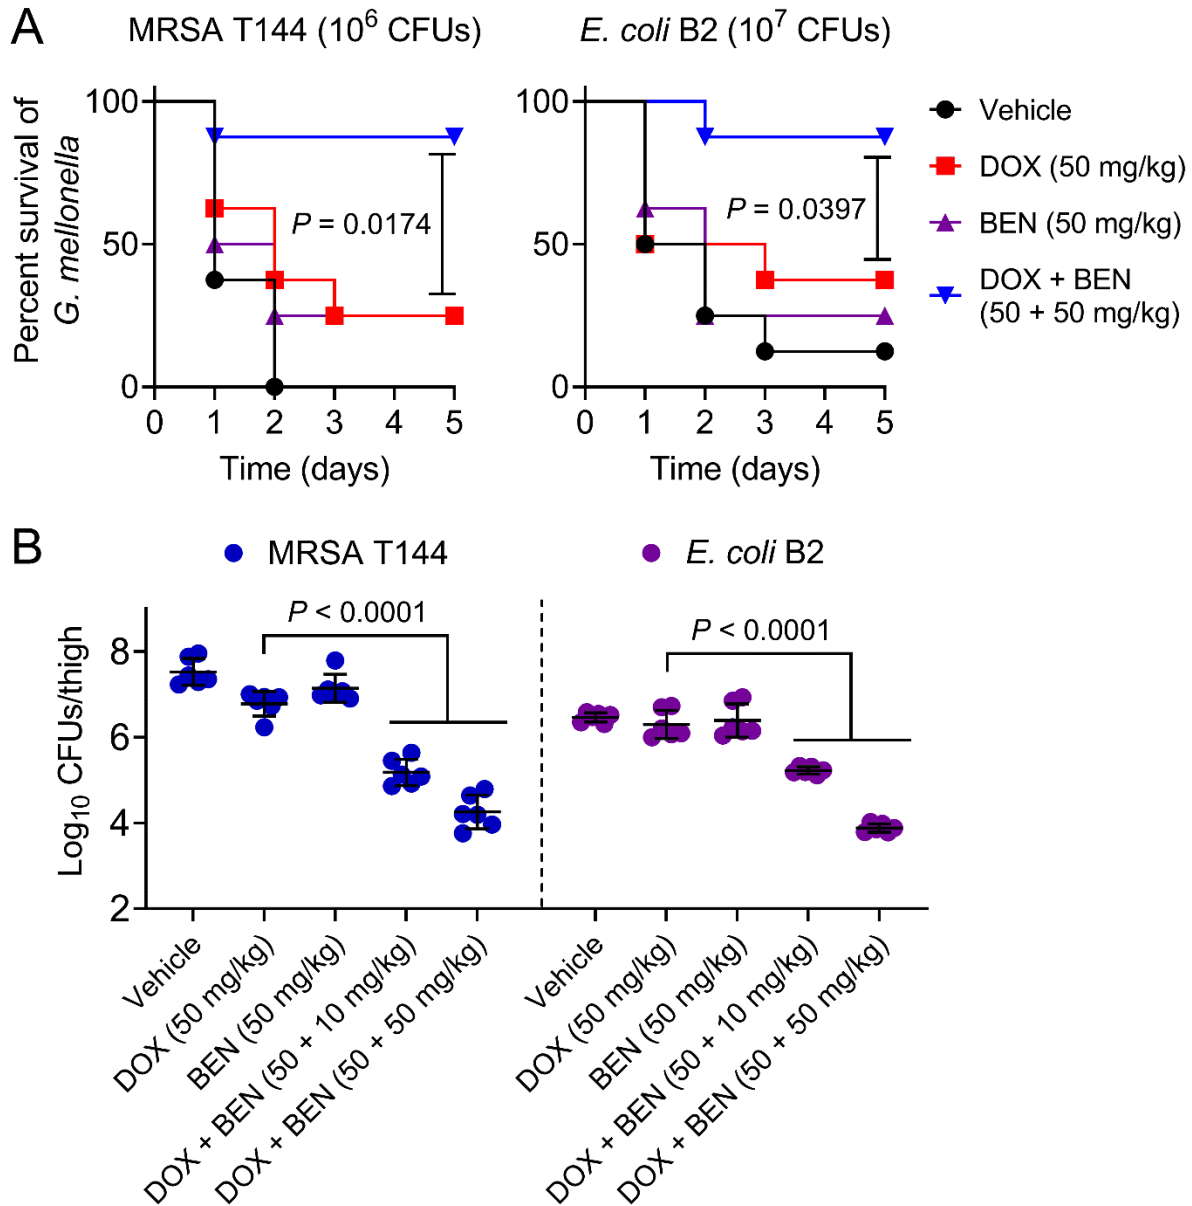

808

809 **Figure 7. The combination of doxycycline and benzydamine is efficacious in various**

810 **animals infection models.**

811 (A) Survival rates of *Galleria mellonella* (n = 8 per group) infected by MRSA T144 or *E. coli*

812 B2 and then treated with doxycycline (50 mg/kg) or benzydamine (50mg/kg) alone or a

813 combination of doxycycline plus benzydamine (50 + 50 mg/kg).

814 (B) Combination of doxycycline (50 mg/kg) and benzydamine (50 mg/kg) significantly

815 reduced the thigh bacterial loads of mice (n = 6 per group) infected by MRSA T144 or *E. coli*

816 B2 (10<sup>5</sup> CFUs per mouse) compared with doxycycline monotherapy (50 mg/kg).

817

818 **Tables**

819 **Table 1. Synergistic activity of benzydamine and antibiotics against MDR *E. coli* B2.**

| Antibiotics     | MIC <sup>a</sup> (µg/mL) | FIC index | MIC <sup>b</sup> (µg/mL) | Potentialiation (fold) <sup>c</sup> |
|-----------------|--------------------------|-----------|--------------------------|-------------------------------------|
| Ampicillin      | >128                     | 2.0       | >128                     | –                                   |
| Meropenem       | 64                       | 2.0       | 64                       | –                                   |
| Rifampicin      | 128                      | 1.5       | 64                       | 2                                   |
| Vancomycin      | 128                      | 2.0       | 128                      | –                                   |
| Kanamycin       | 256                      | >2        | >256                     | –                                   |
| Colistin        | 8                        | 0.5       | 2                        | 4                                   |
| Ciprofloxacin   | 16                       | 0.375     | 4                        | 4                                   |
| Doxycycline     | 32                       | 0.188     | 2                        | 16                                  |
| Tetracycline    | 128                      | 0.25      | 16                       | 8                                   |
| Oxytetracycline | 256                      | 0.375     | 64                       | 4                                   |
| Minocycline     | 16                       | 0.188     | 1                        | 16                                  |
| Tigecycline     | 2                        | 1.0       | 1                        | 2                                   |

820 <sup>a/b</sup>MICs of antibiotic in the absence or presence of 0.25×MIC of benzydamine.

821 <sup>c</sup>Degree of antibiotic potentialiation in the presence of 0.25×MIC of benzydamine.

822 –, none of potentialiation activity.

823

824 **Table 2. Synergistic activity of benzydamine and doxycycline against**  
825 **drug-sensitive or resistant bacteria.**

| Pathogens                        | MIC <sup>a</sup><br>( $\mu\text{g}/\text{mL}$ ) | FIC index | MIC <sup>b</sup><br>( $\mu\text{g}/\text{mL}$ ) | Potentialiation<br>(fold) <sup>c</sup> |
|----------------------------------|-------------------------------------------------|-----------|-------------------------------------------------|----------------------------------------|
| <b>Sensitive bacteria</b>        |                                                 |           |                                                 |                                        |
| <i>S. aureus</i> ATCC 29213      | 0.5                                             | 0.5       | 0.125                                           | 4                                      |
| <i>E. coli</i> ATCC 25922        | 1                                               | 0.5       | 0.25                                            | 4                                      |
| <i>S. enteritidis</i> ATCC 13076 | 2                                               | 0.5       | 0.5                                             | 4                                      |
| <i>E. coli</i> MG1655            | 2                                               | 0.5       | 0.5                                             | 4                                      |
| <b>Resistant bacteria</b>        |                                                 |           |                                                 |                                        |
| MRSA T144                        | 16                                              | 0.188     | 1                                               | 16                                     |
| VRE A4                           | 32                                              | 0.375     | 8                                               | 4                                      |
| <i>E. coli</i> G6                | 16                                              | 0.375     | 2                                               | 8                                      |
| <i>K. pneumoniae</i> D120        | 32                                              | 0.375     | 4                                               | 8                                      |
| <i>A. baumannii</i> C222         | 16                                              | 0.5       | 4                                               | 4                                      |

826 <sup>a/b</sup>MICs of antibiotic in the absence or presence of 0.25×MIC of benzydamine.

827 <sup>c</sup>Degree of antibiotic potentialiation in the presence of 0.25×MIC of benzydamine.

828 –, none of potentialiation activity.

829
